# Supplementary material for: Preoperative carbohydrate loading reduces length of hospital stay compared to fasting in patients undergoing major elective, non-cardiac surgery: A systematic Review and Meta- Analysis
Source: Research Square preprint supplement (doi:10.21203/rs.3.rs-4085704/v1), 2024-04-19
Supplement: Supplementary file 1 [file ad437c03591a24fd16c3e746.docx]

# **Supplemetary Table of Preoperative carbohydrate loading reduces length of hospital stay compared to fasting in patients undergoing major elective, non-cardiac surgery: A systematic Review and Meta-Analysis**

*Figure 1. Baseline characteristics*

## **Forest plot of outcomes which are not included in the manuscript**

### **Preoperative carbohydrate loading versus fasting**


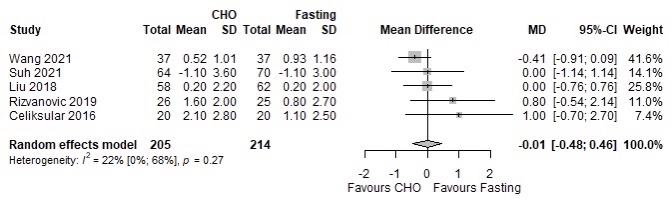


*S2. Postoperative glucose levels on postoperative day 1*


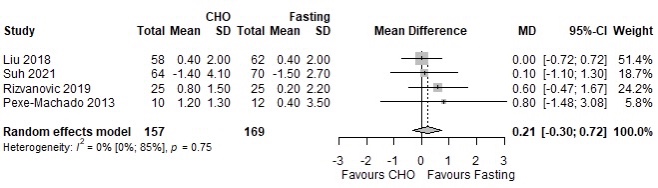


*S3.Postoperative glucose levels on postoperative day 2*


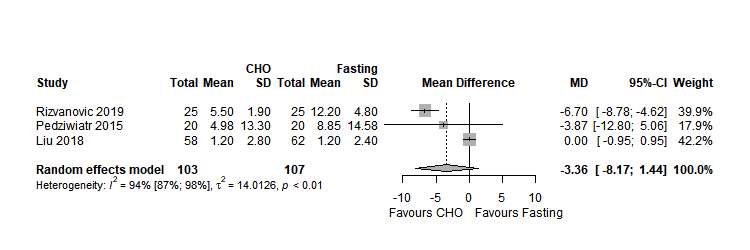


*S4. Postoperative insulin levels on postoperative day 1*


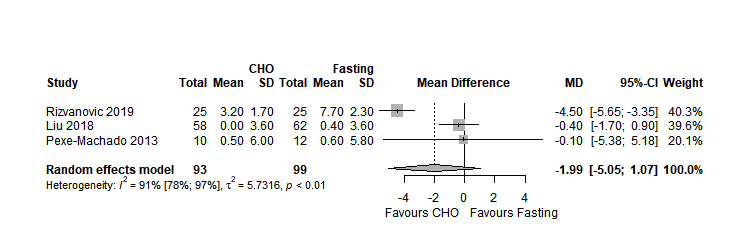


*S5. Postoperative insulin levels on postoperative day 2*

### Preoperative carbohydrate loading versus placebo


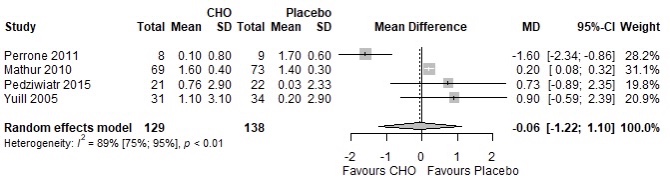


*S6. Postoperative glucose levels on postoperative day 1*


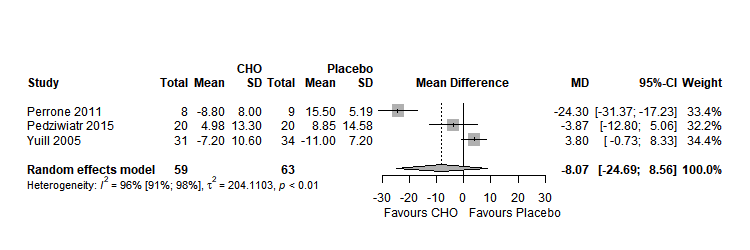


*S7. Postoperative insulin levels on postoperative day 1*

## **Risk of bias assesement**

### **Preoperative carbohydrate loading versus fasting**


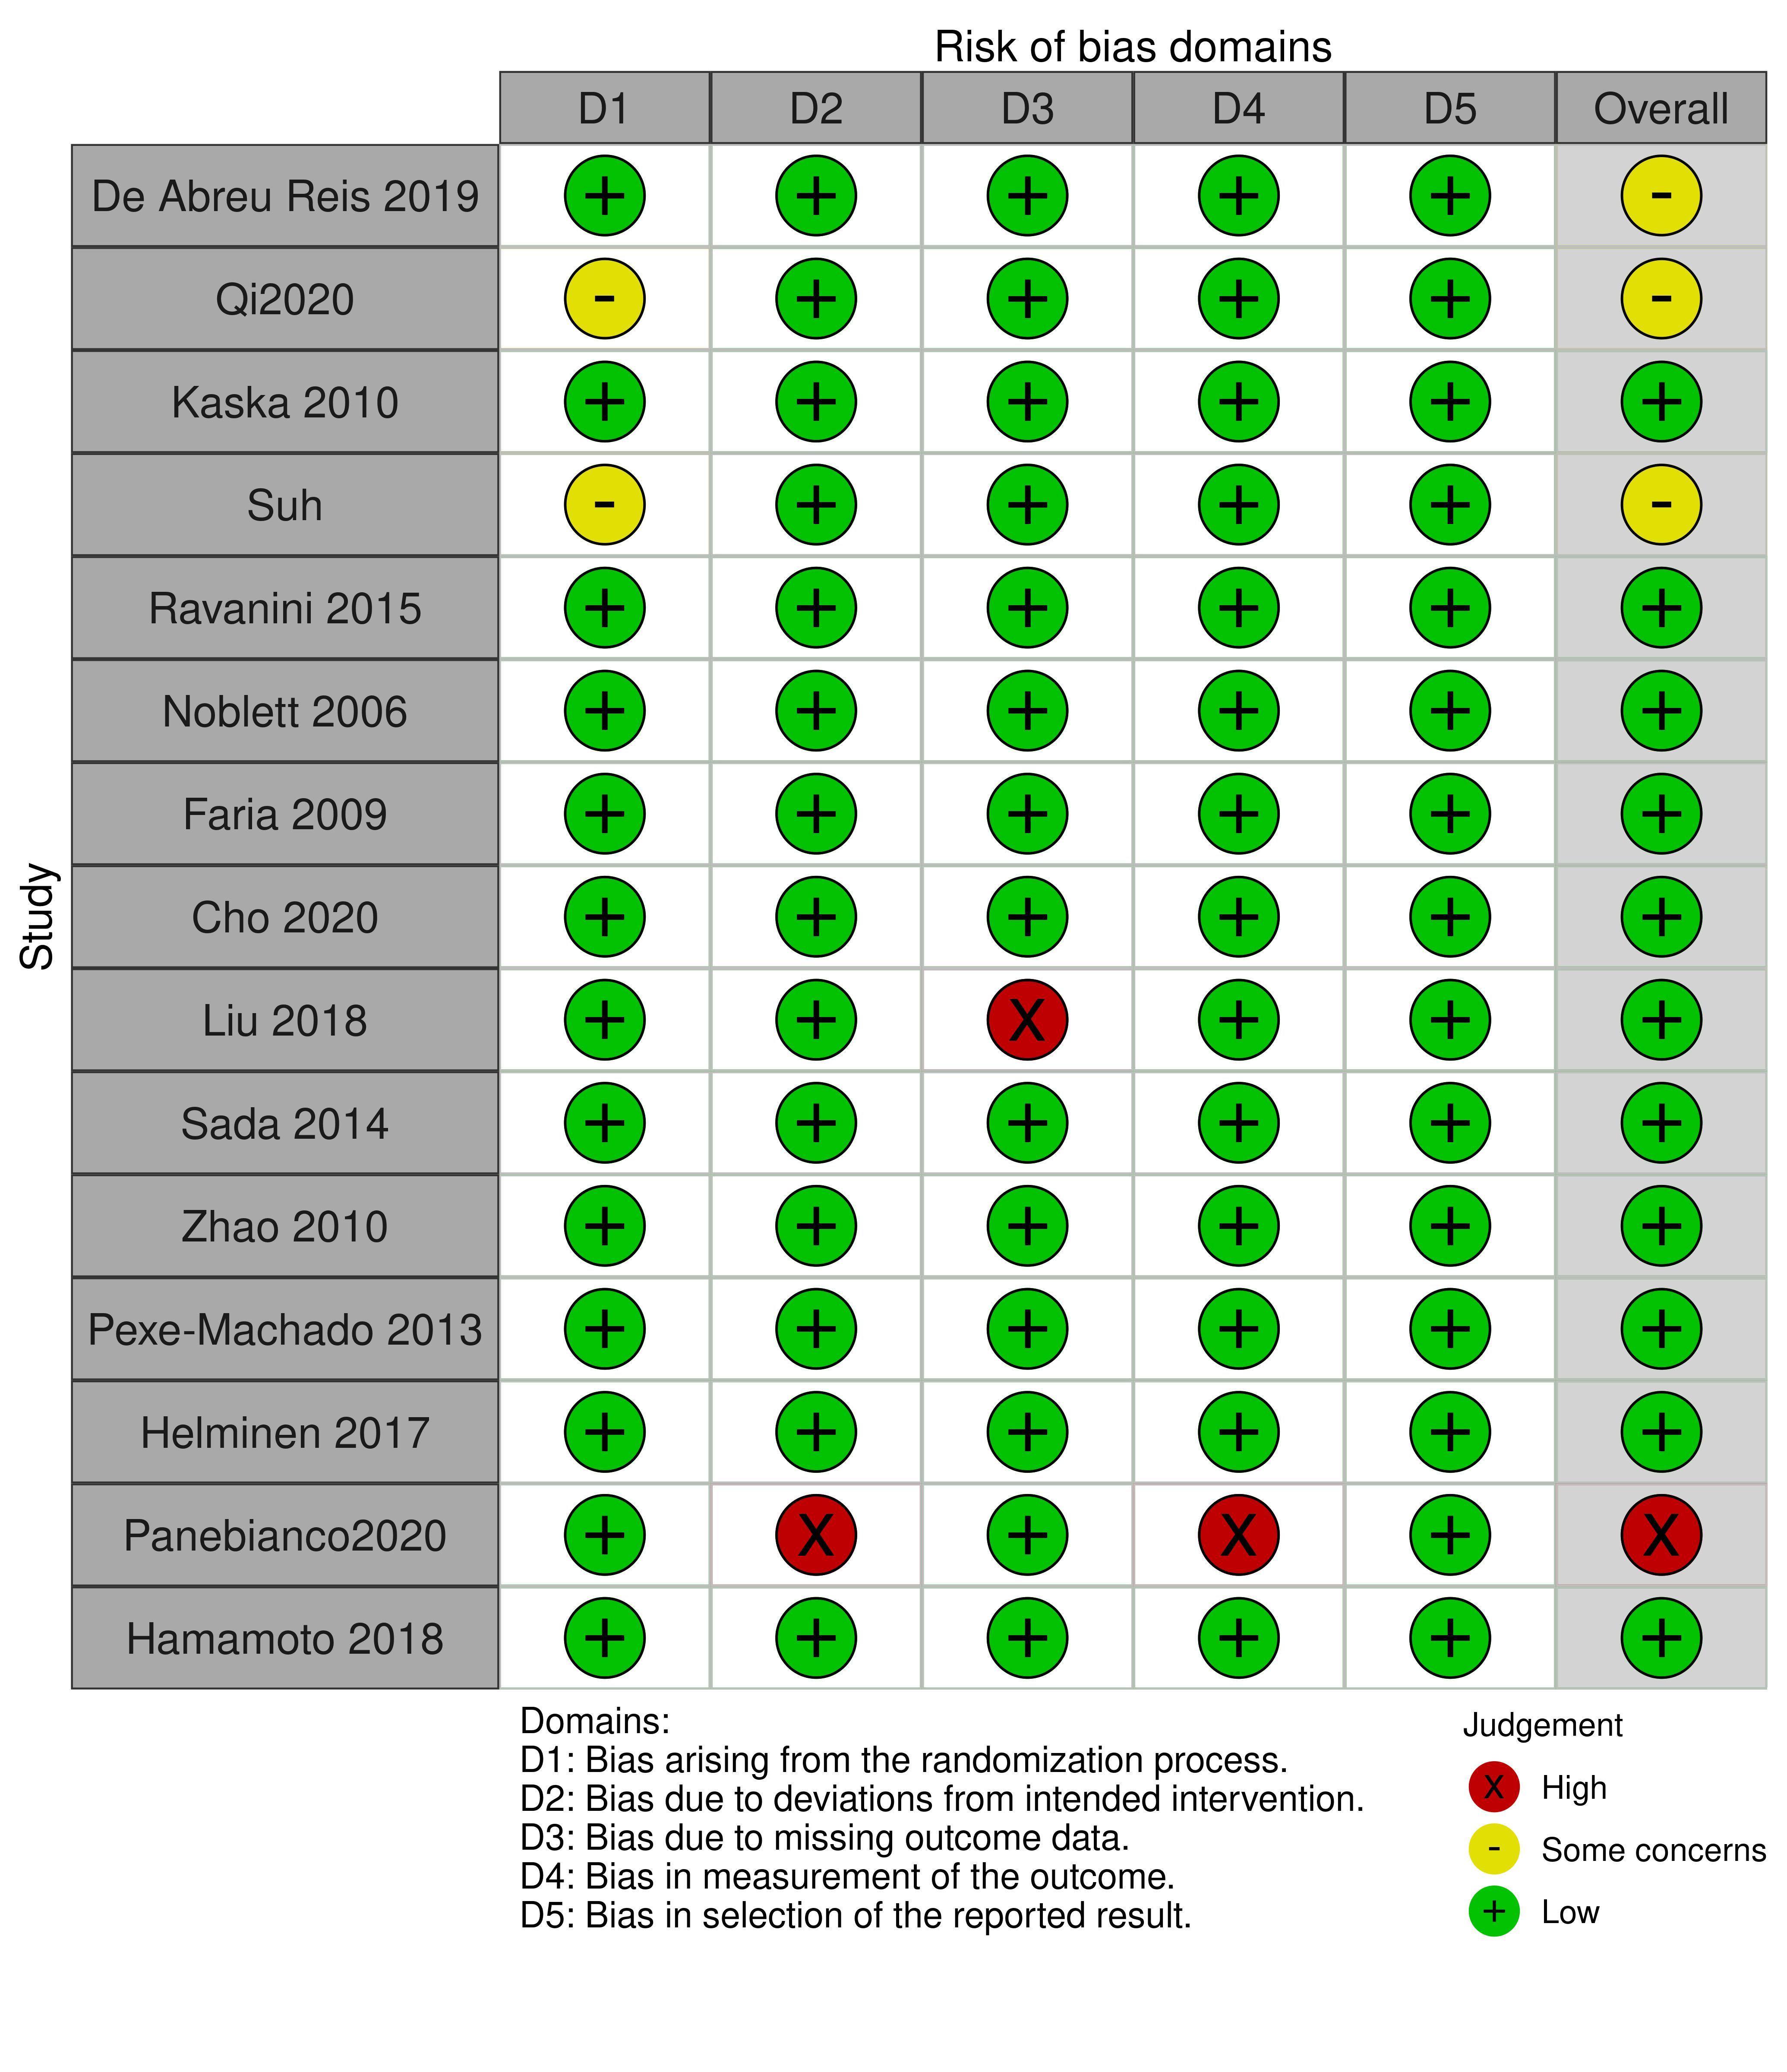


*S8. Length of hospital stay*


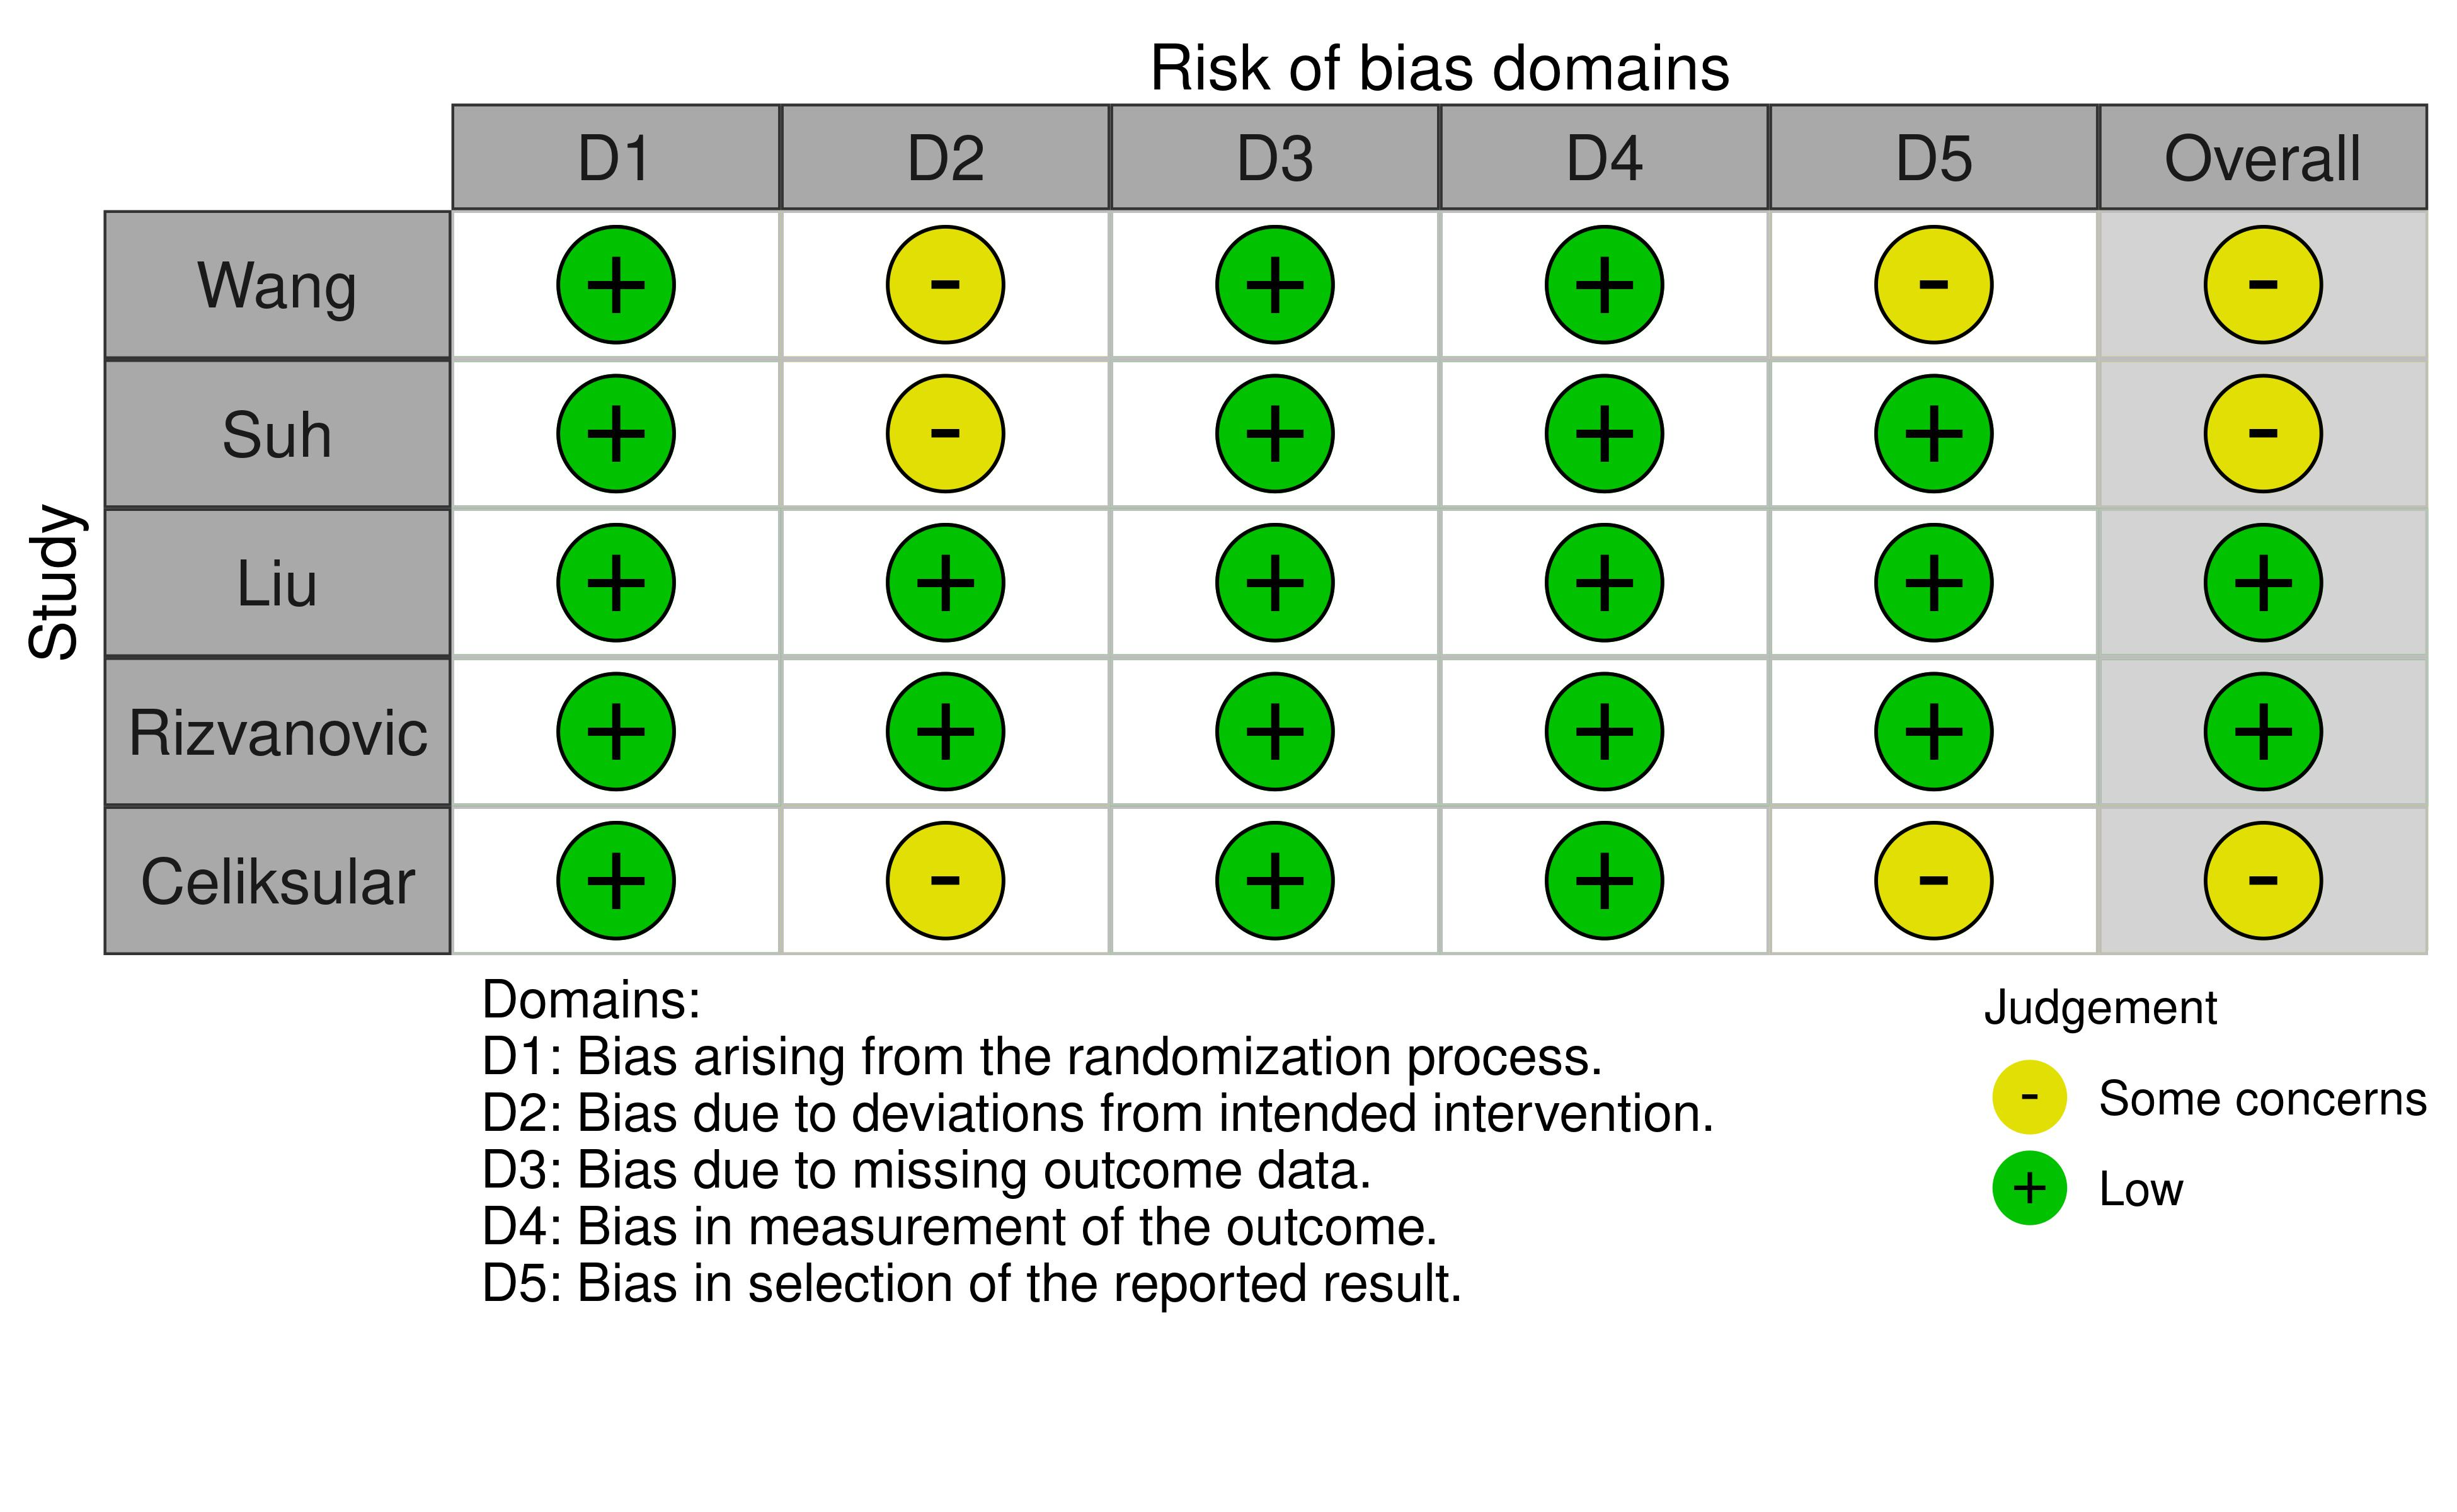


*S9. Postoperative glucose levels on postoperative day 1*


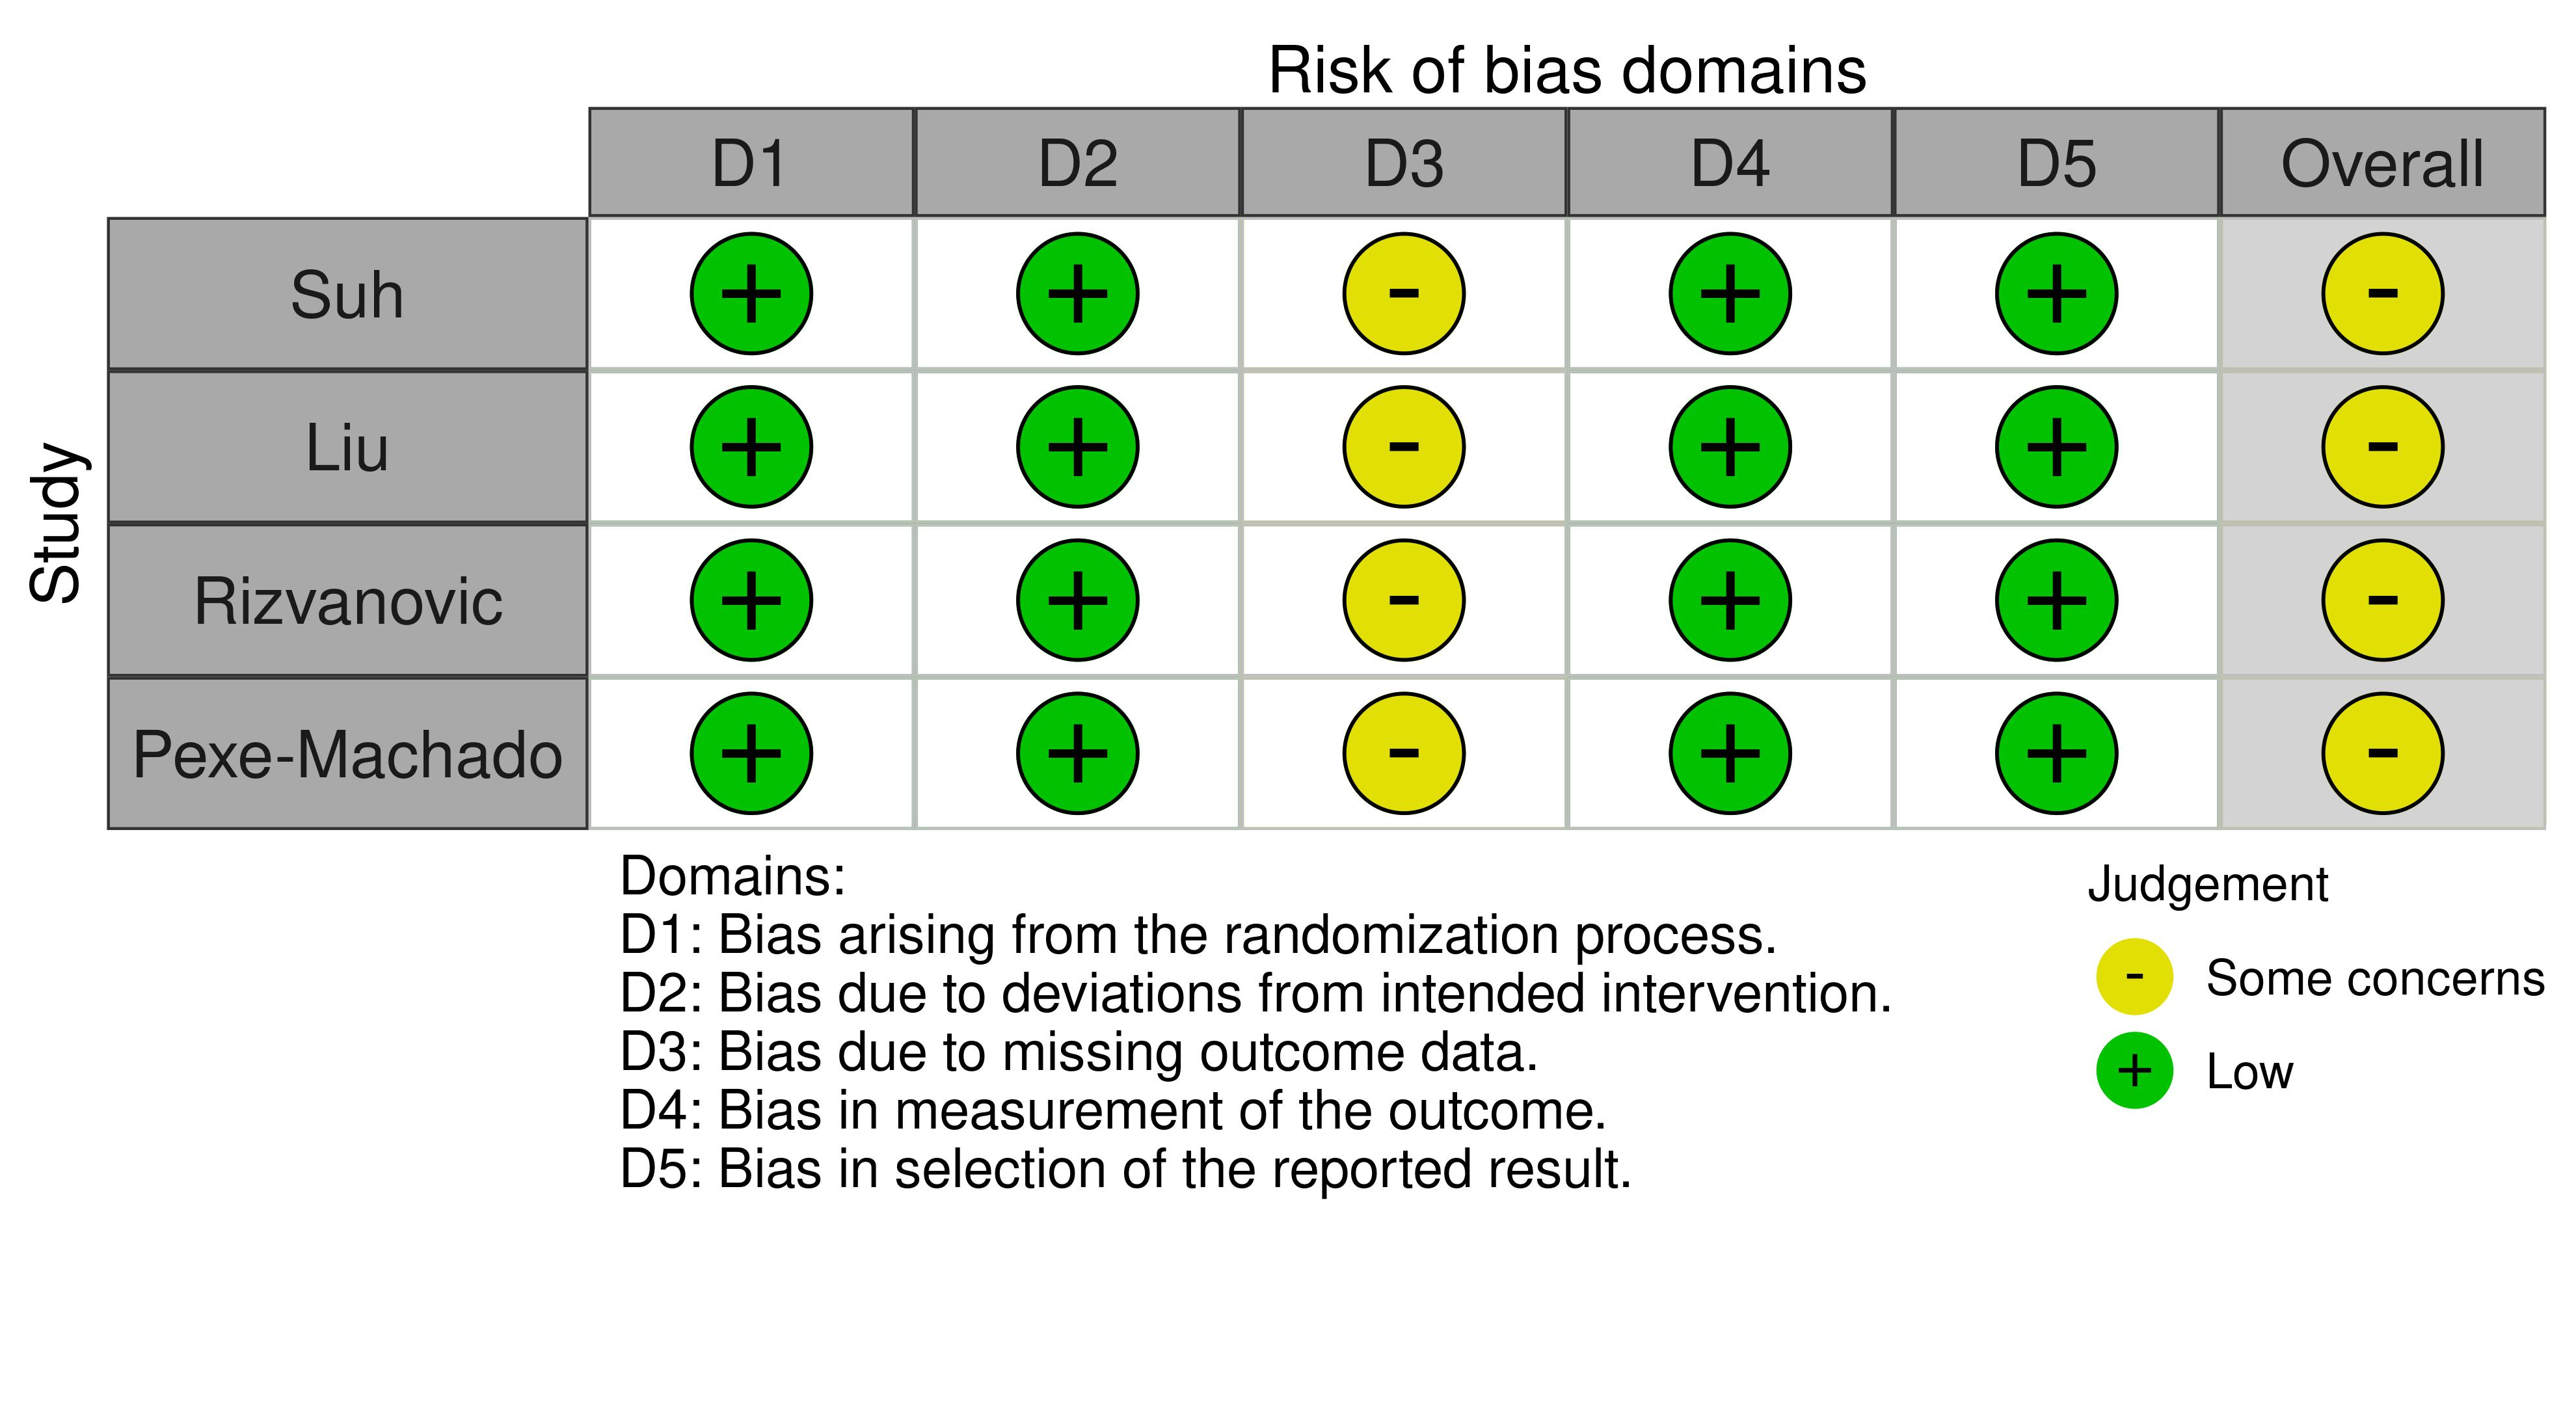


*S10. Postoperative glucose levels on postoperative day 2*


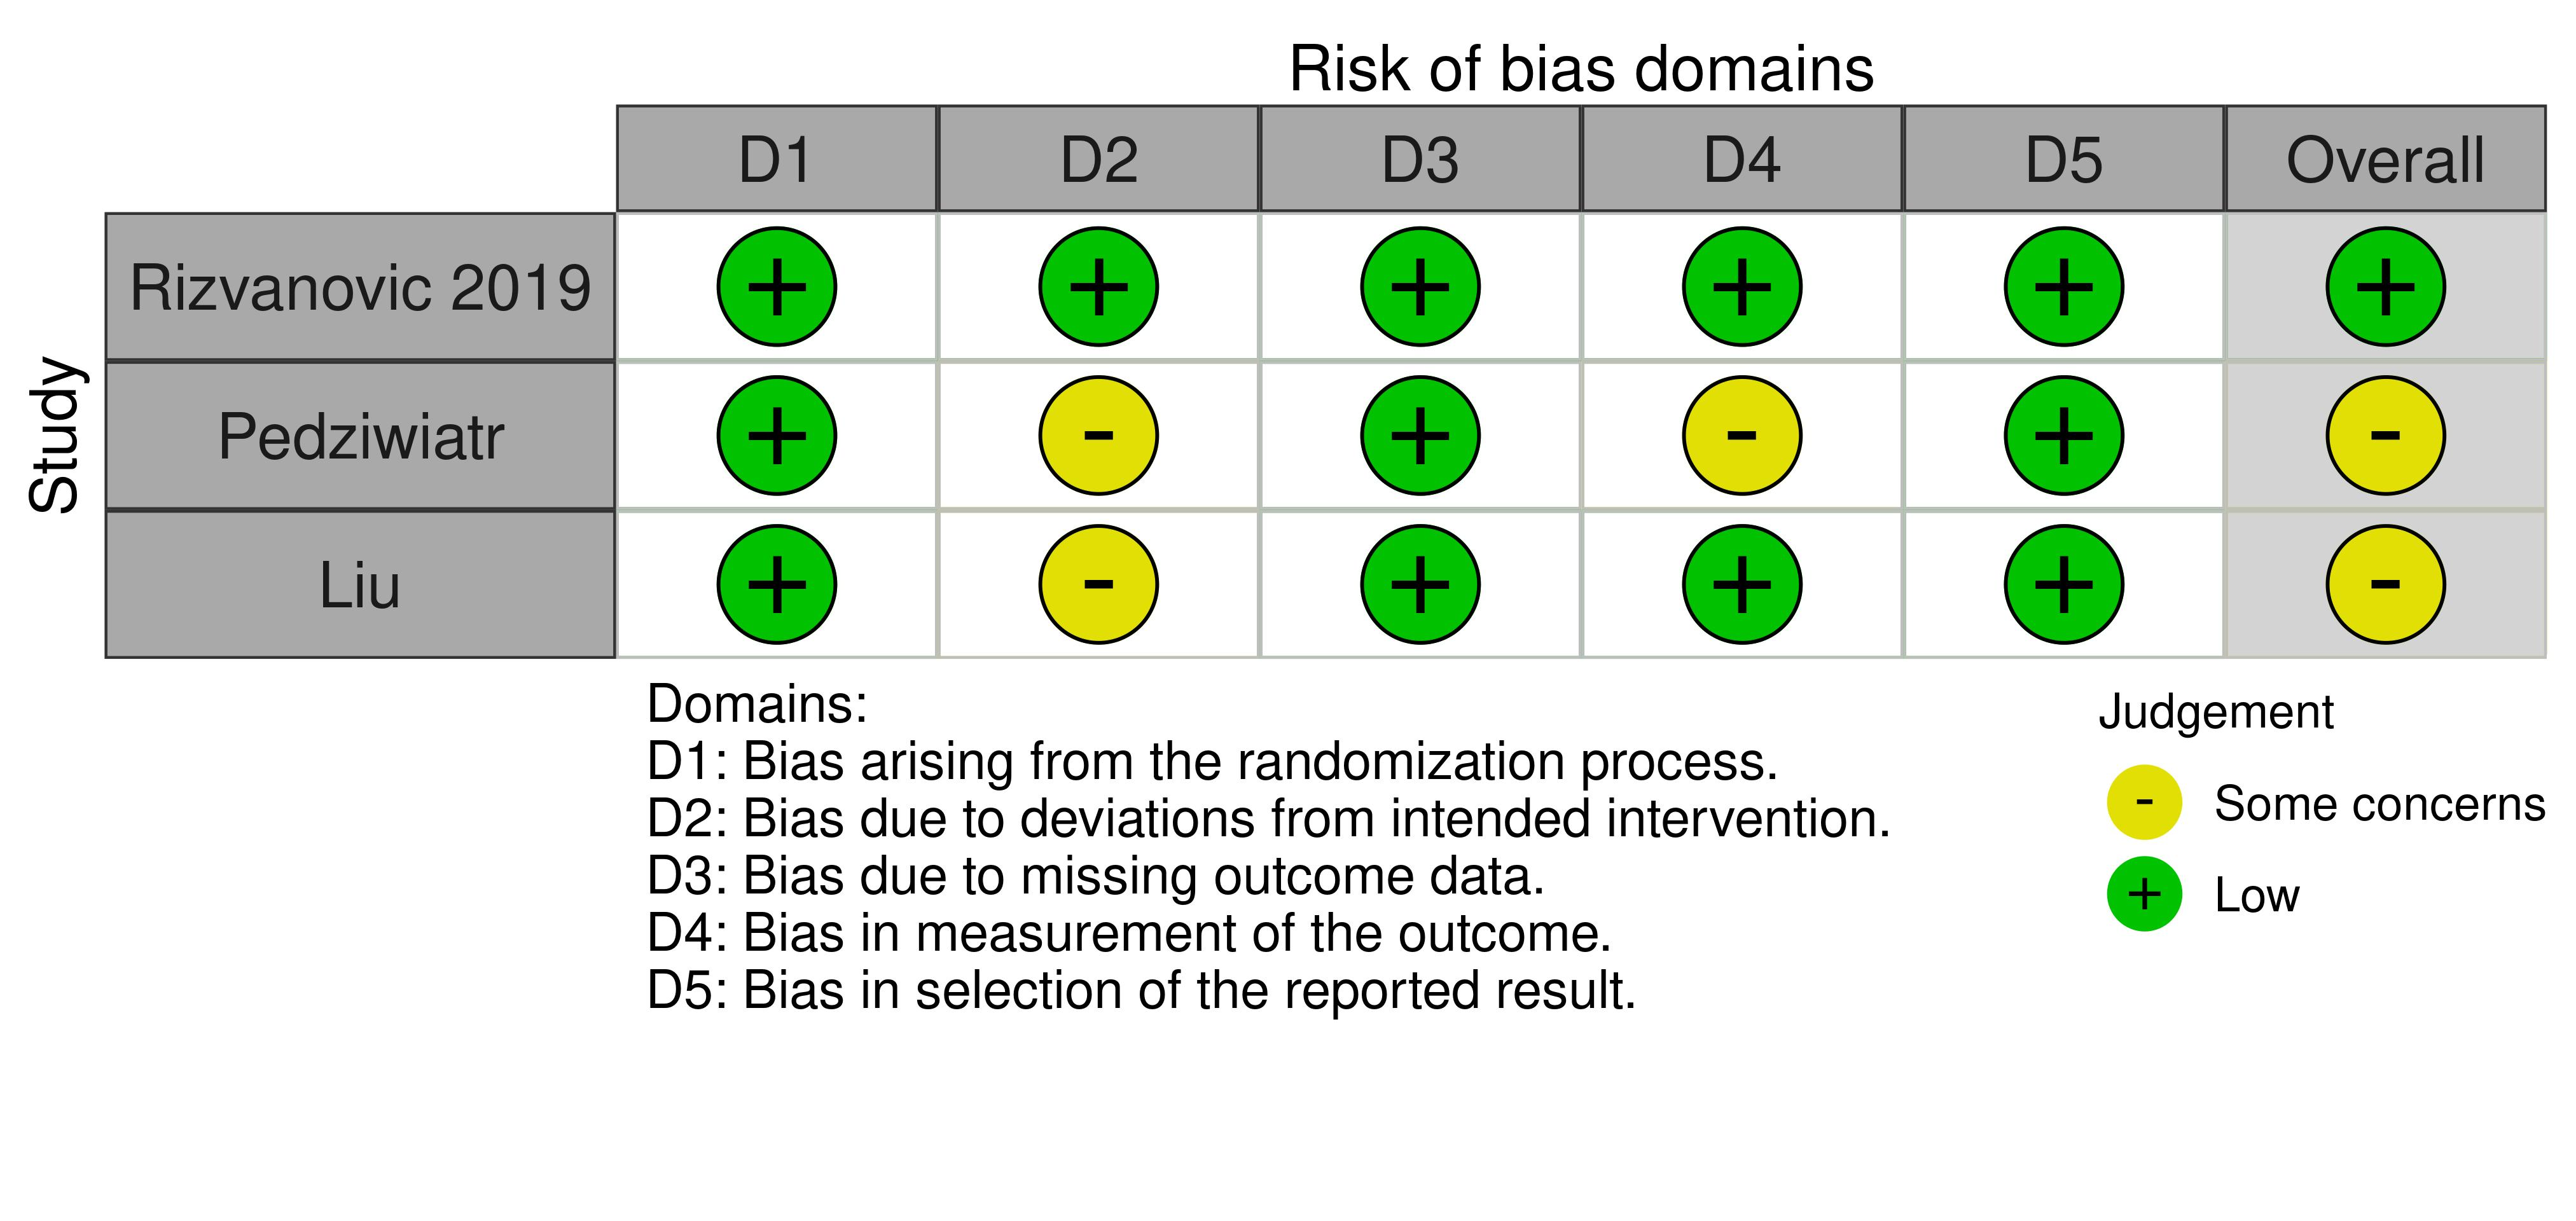


*S11. Postoperative insulin levels on postoperative day 1*


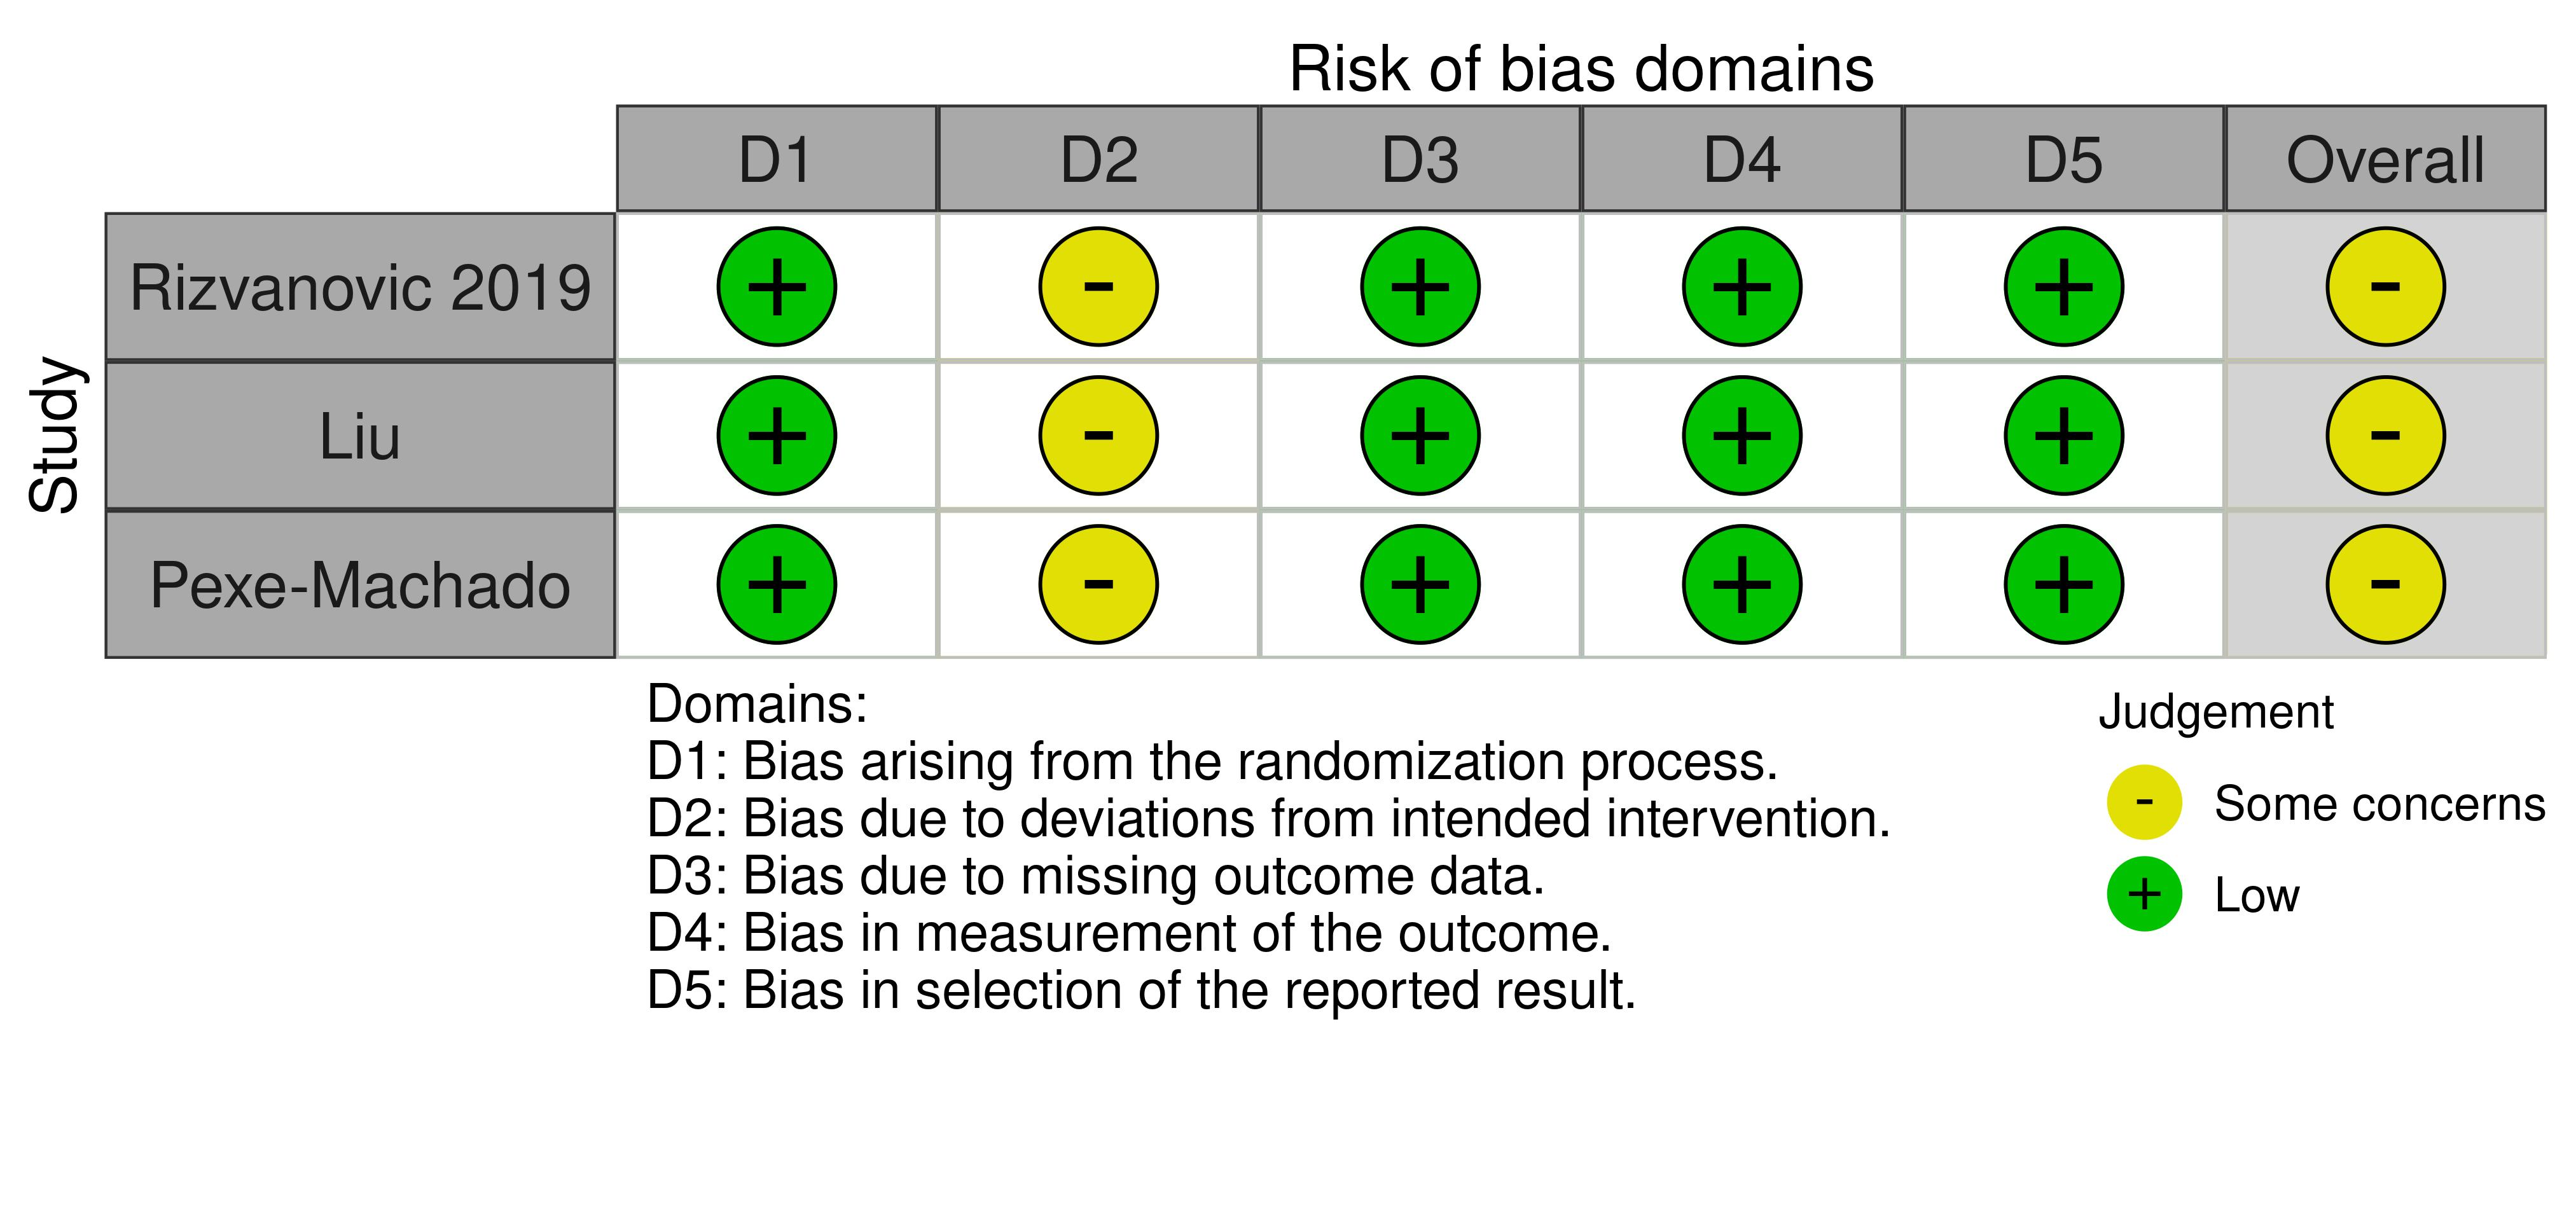


*S12. Postoperative insulin levels on postoperative day 2*


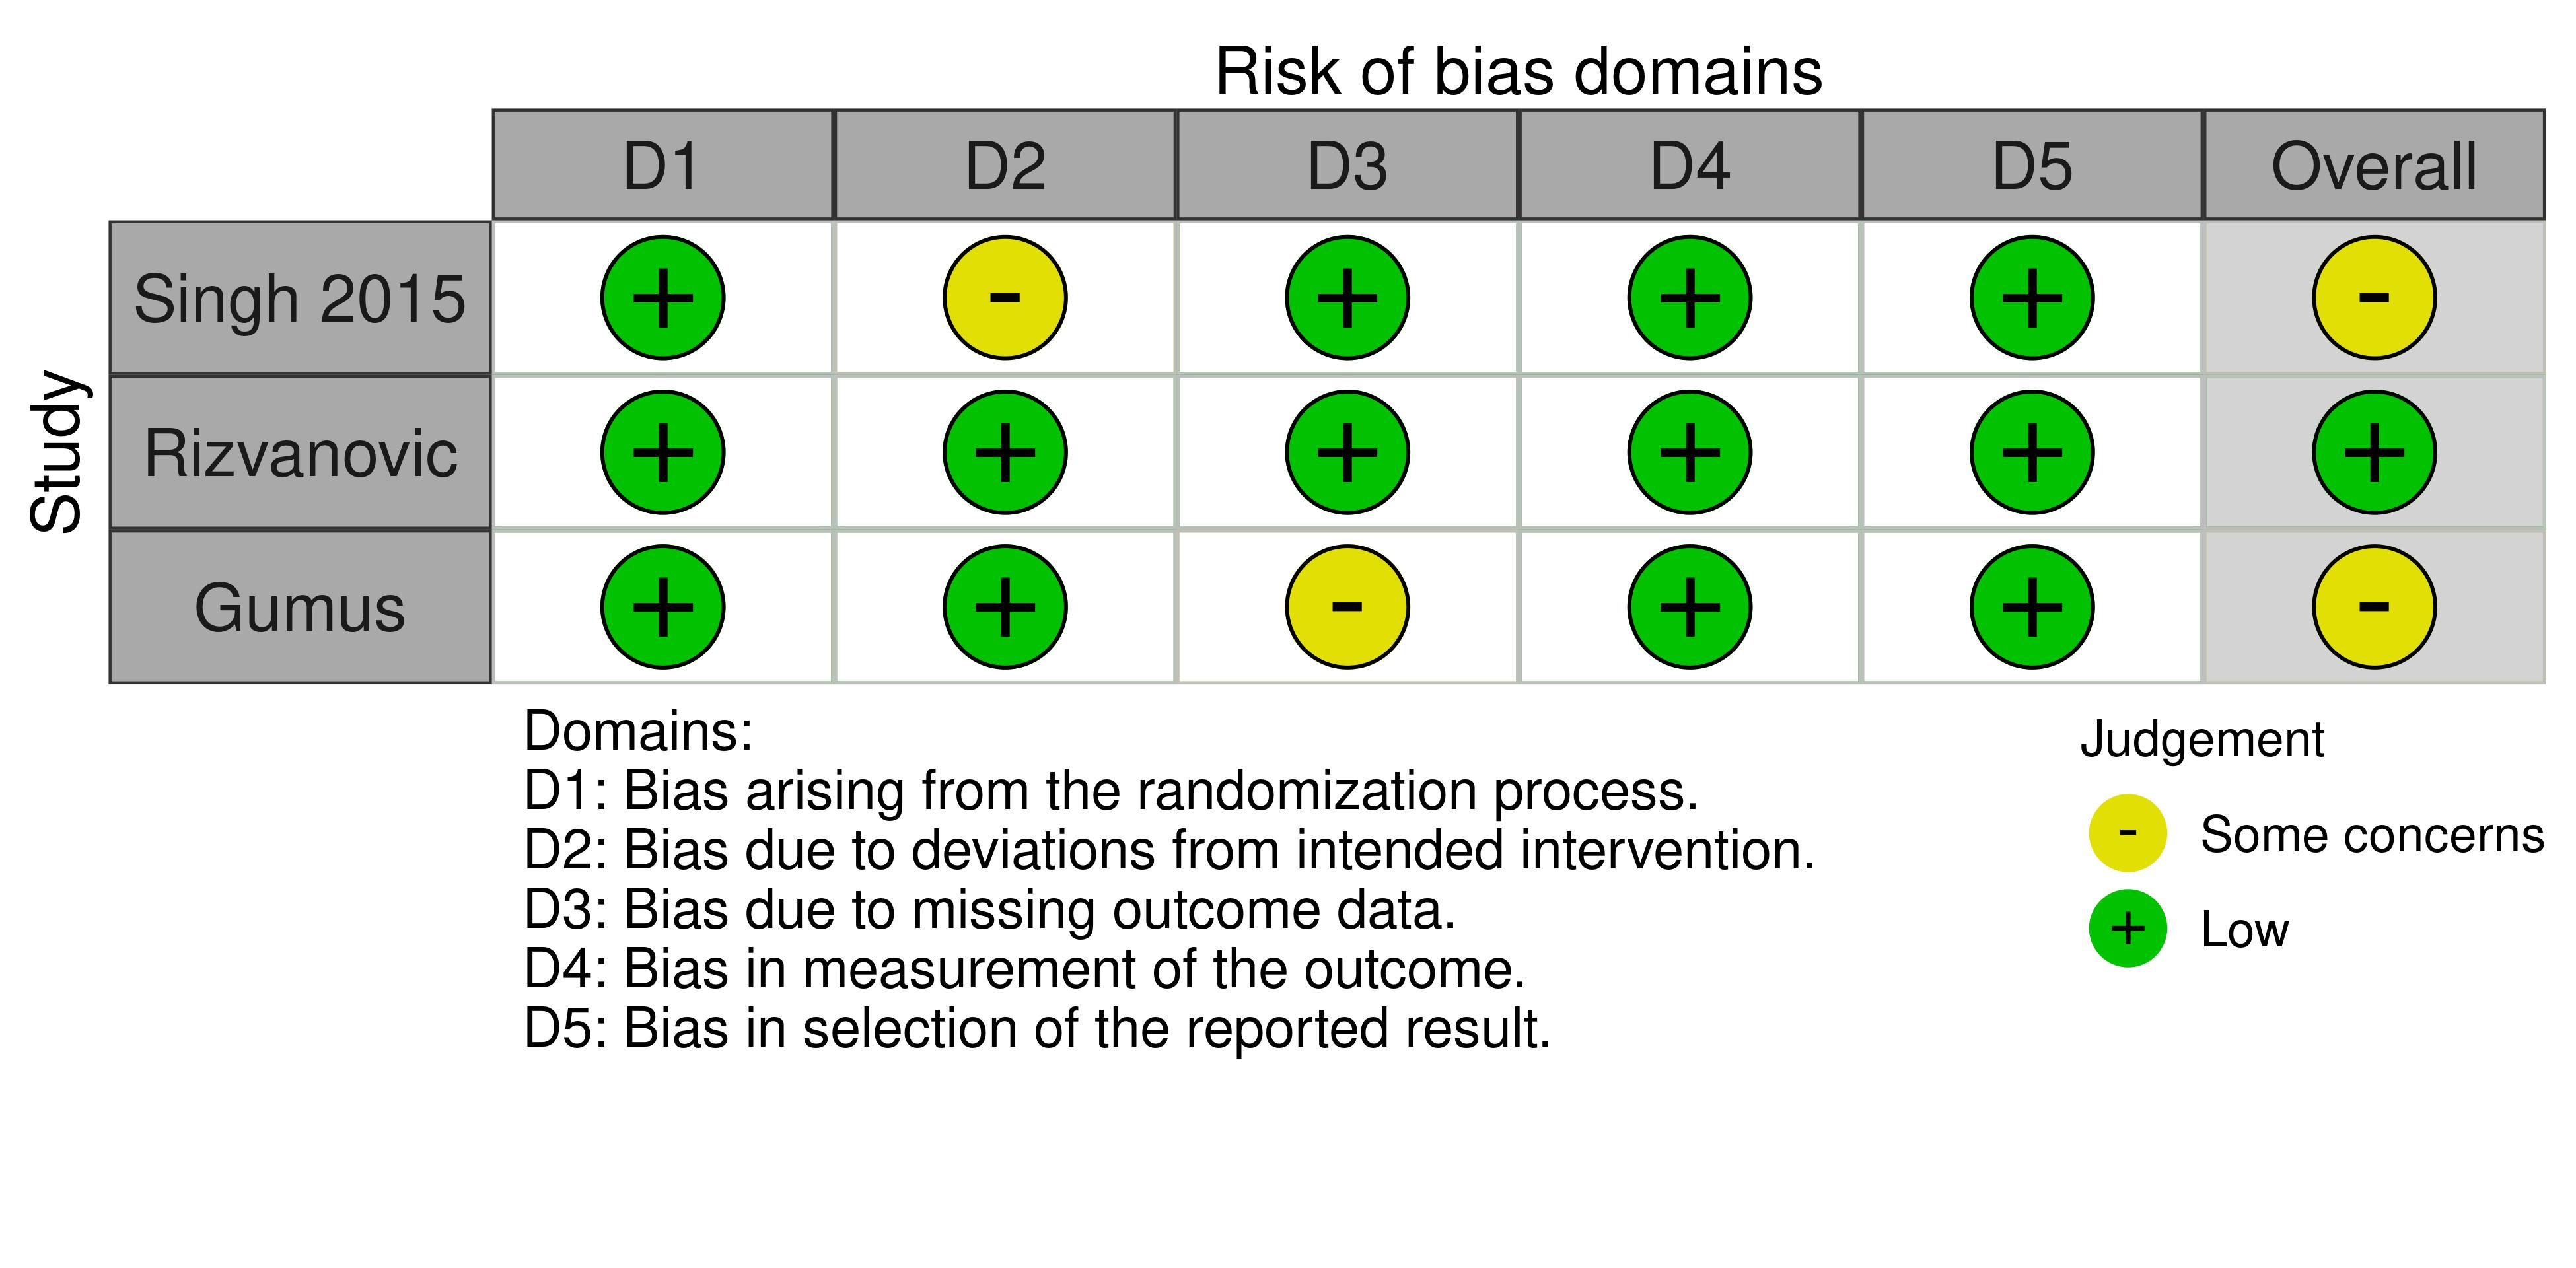


*S13. Postoperative CRP levels on postoperative day 1*

### **Preoperative carbohydrate loading versus placebo**


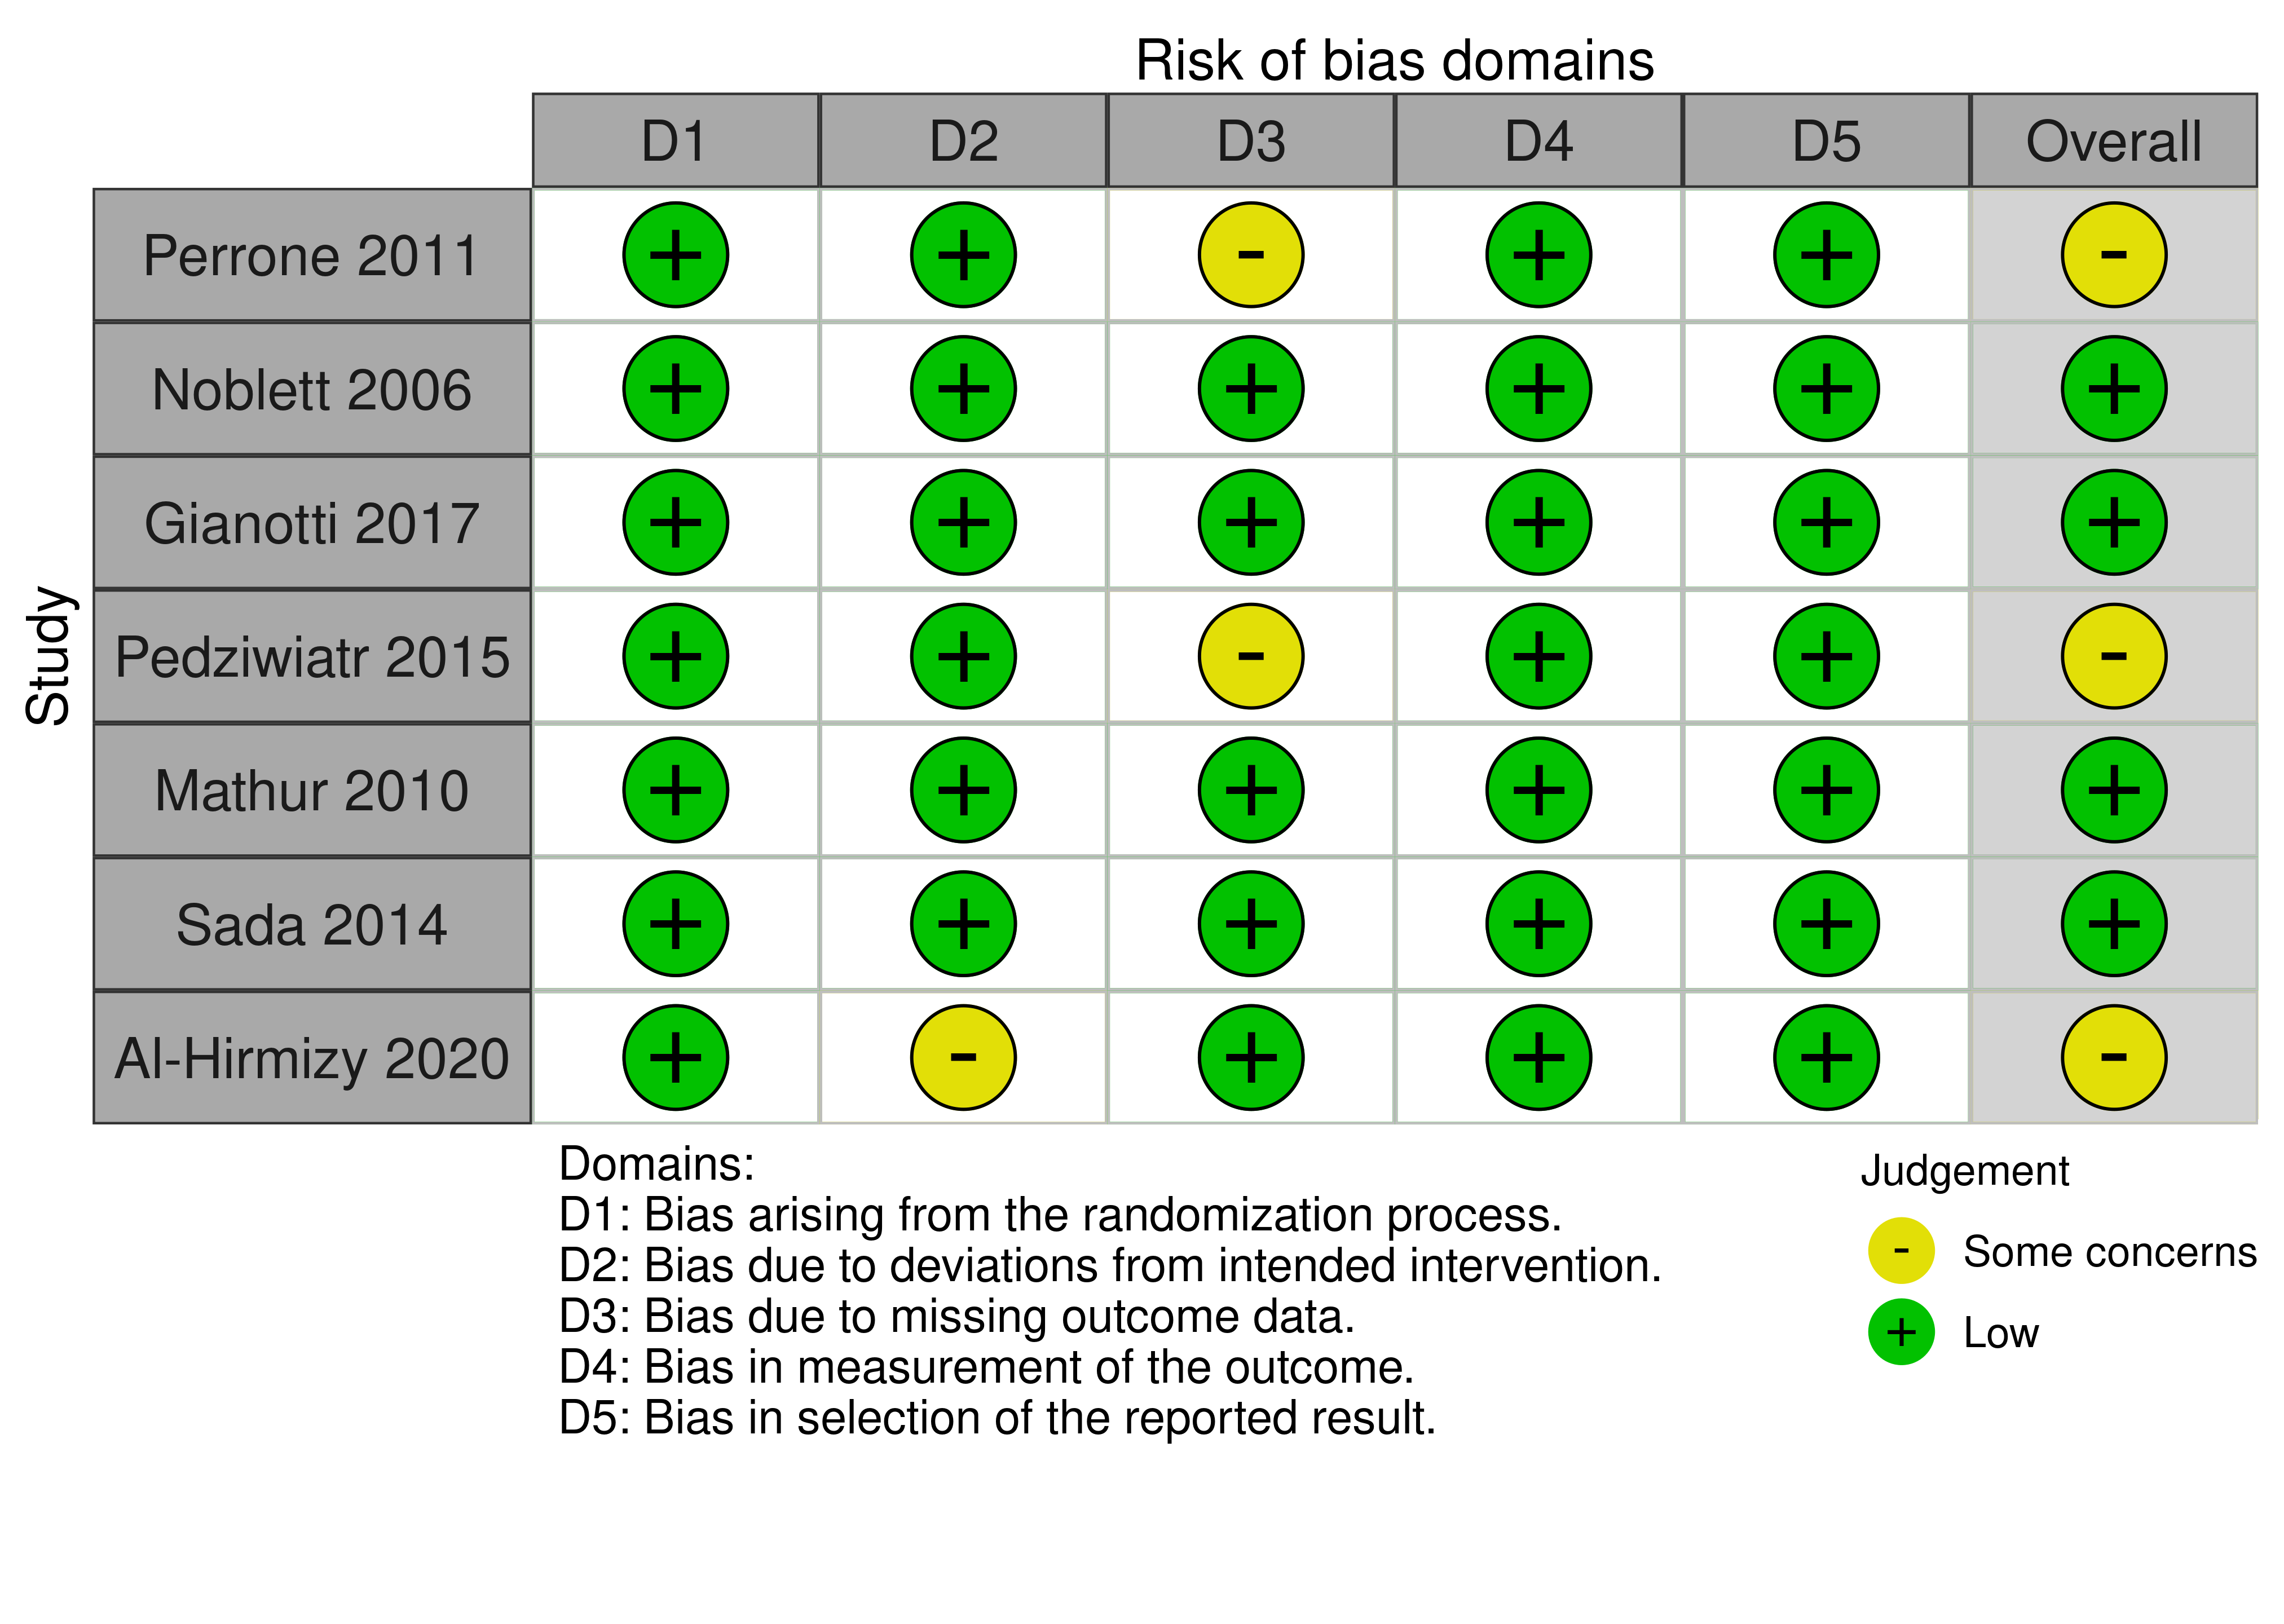
*S14. Length of hospital stay*


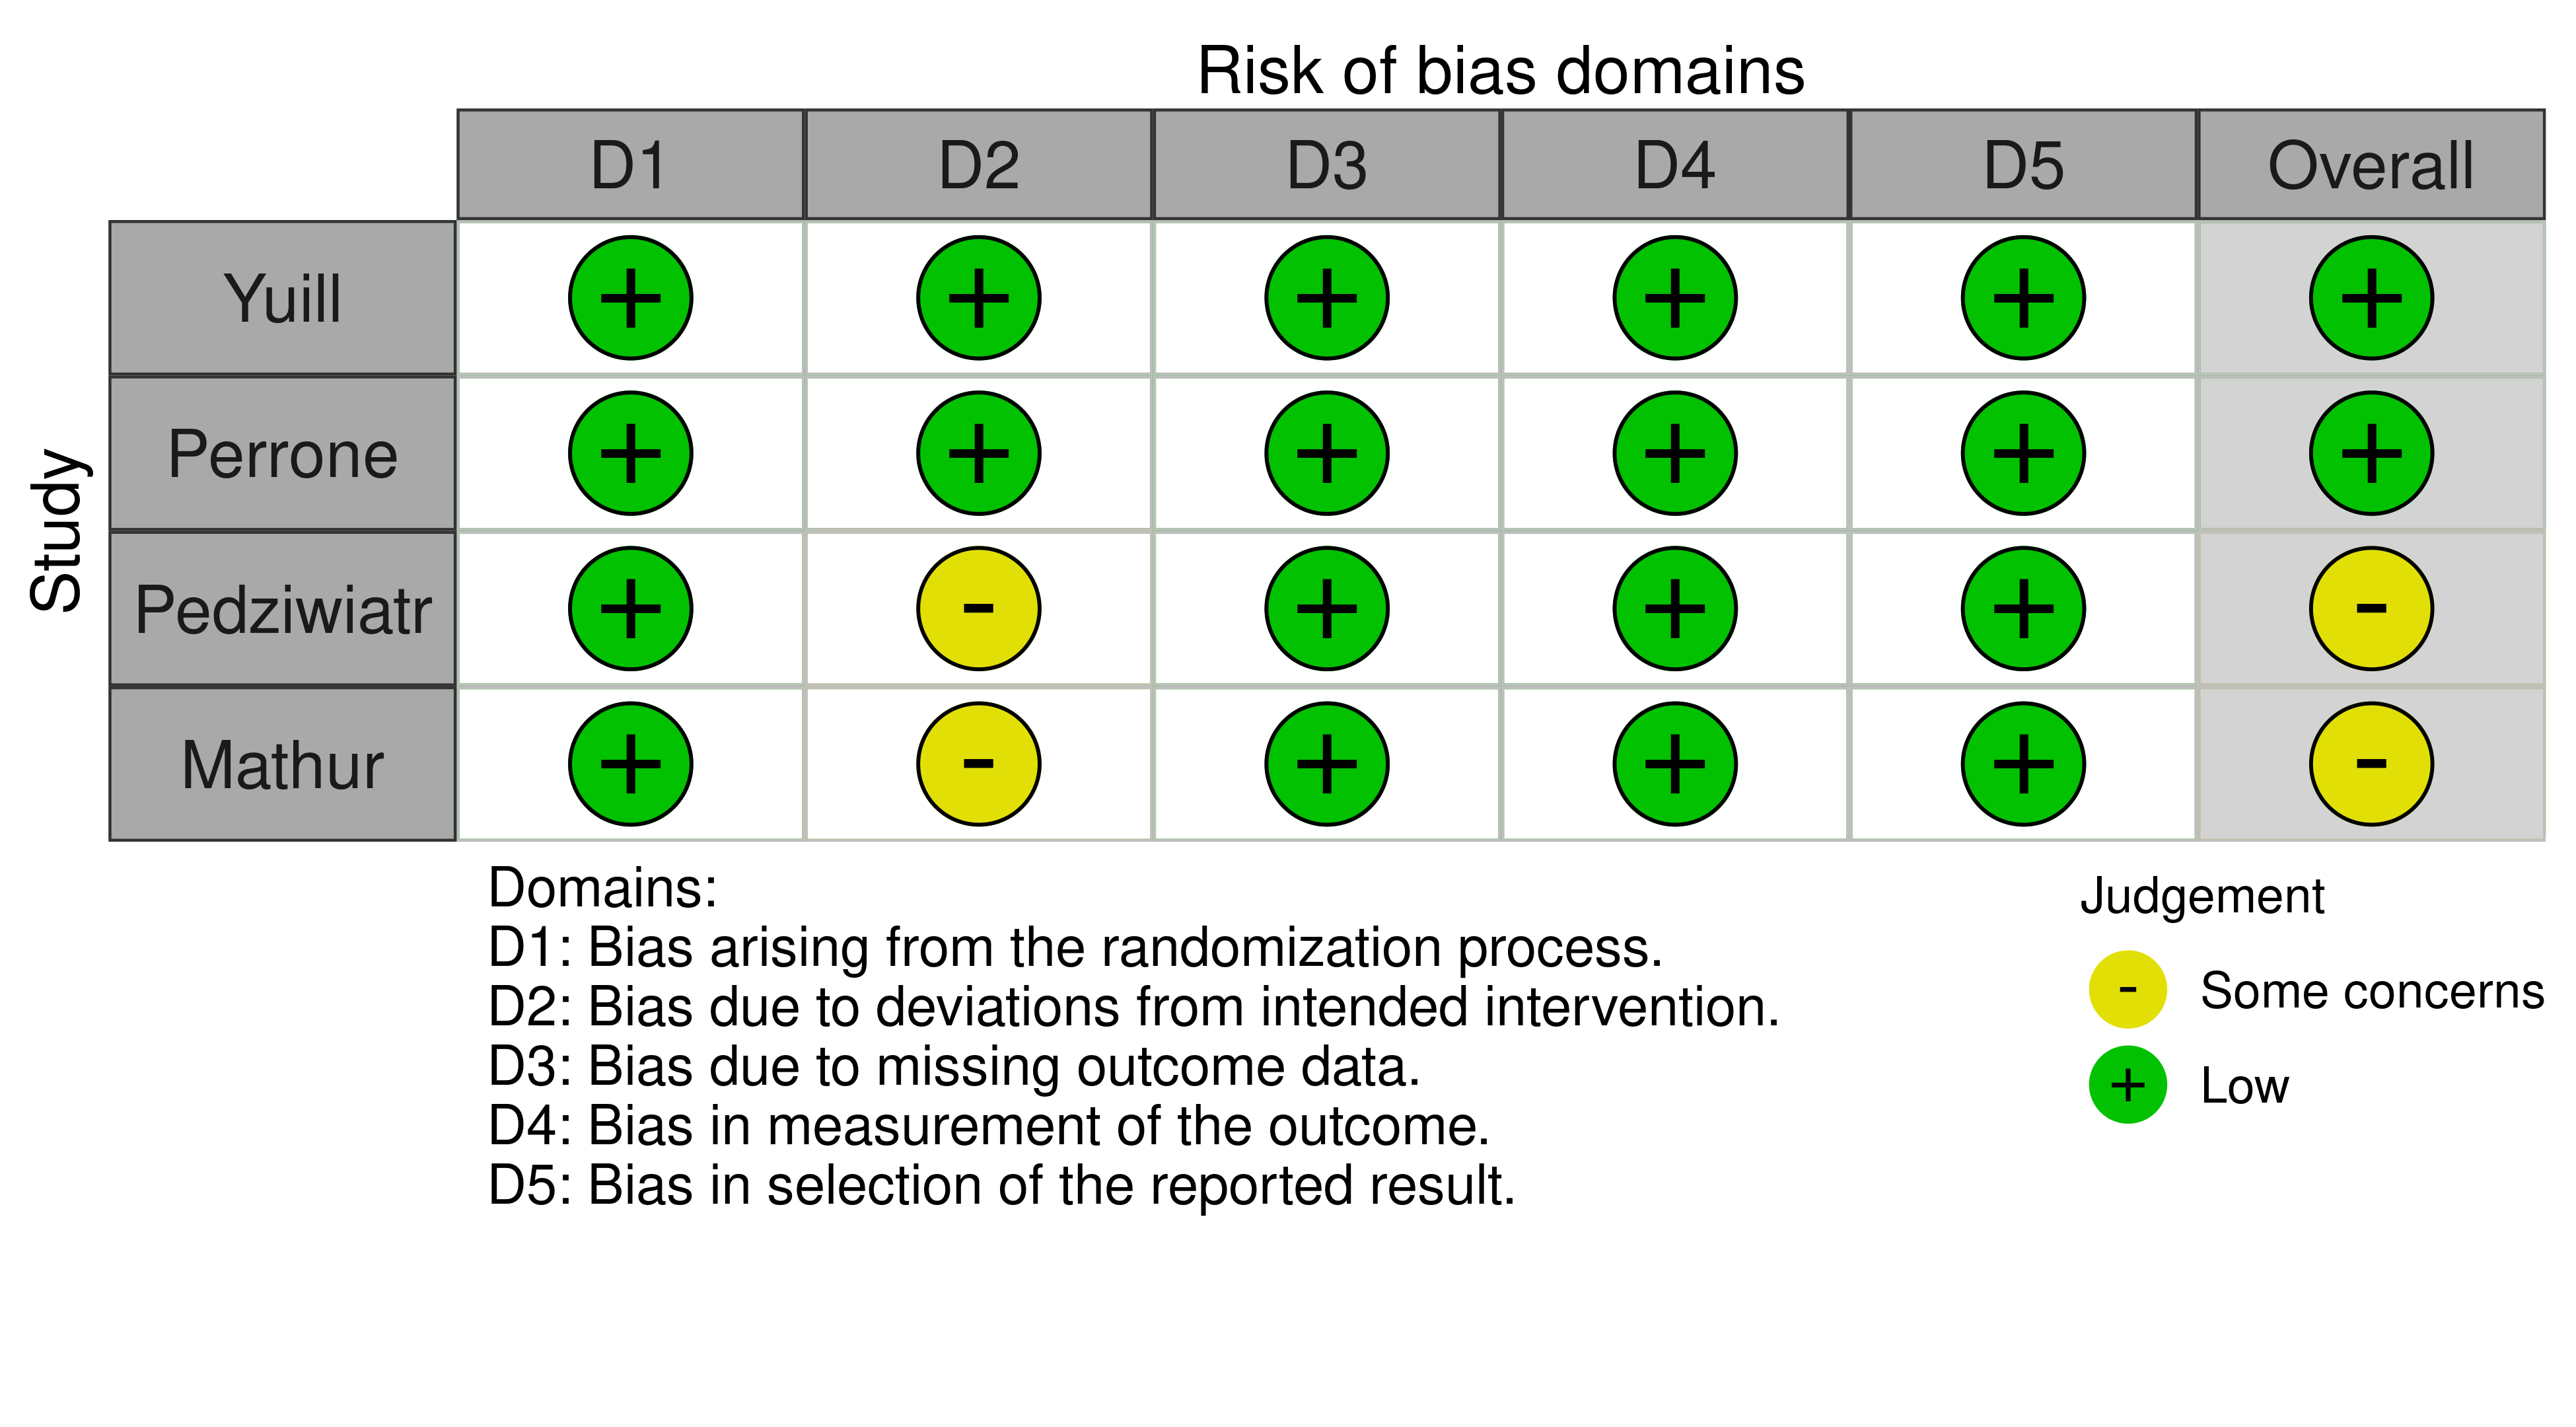


*S15. Postoperative glucose levels on postoperative day 1*


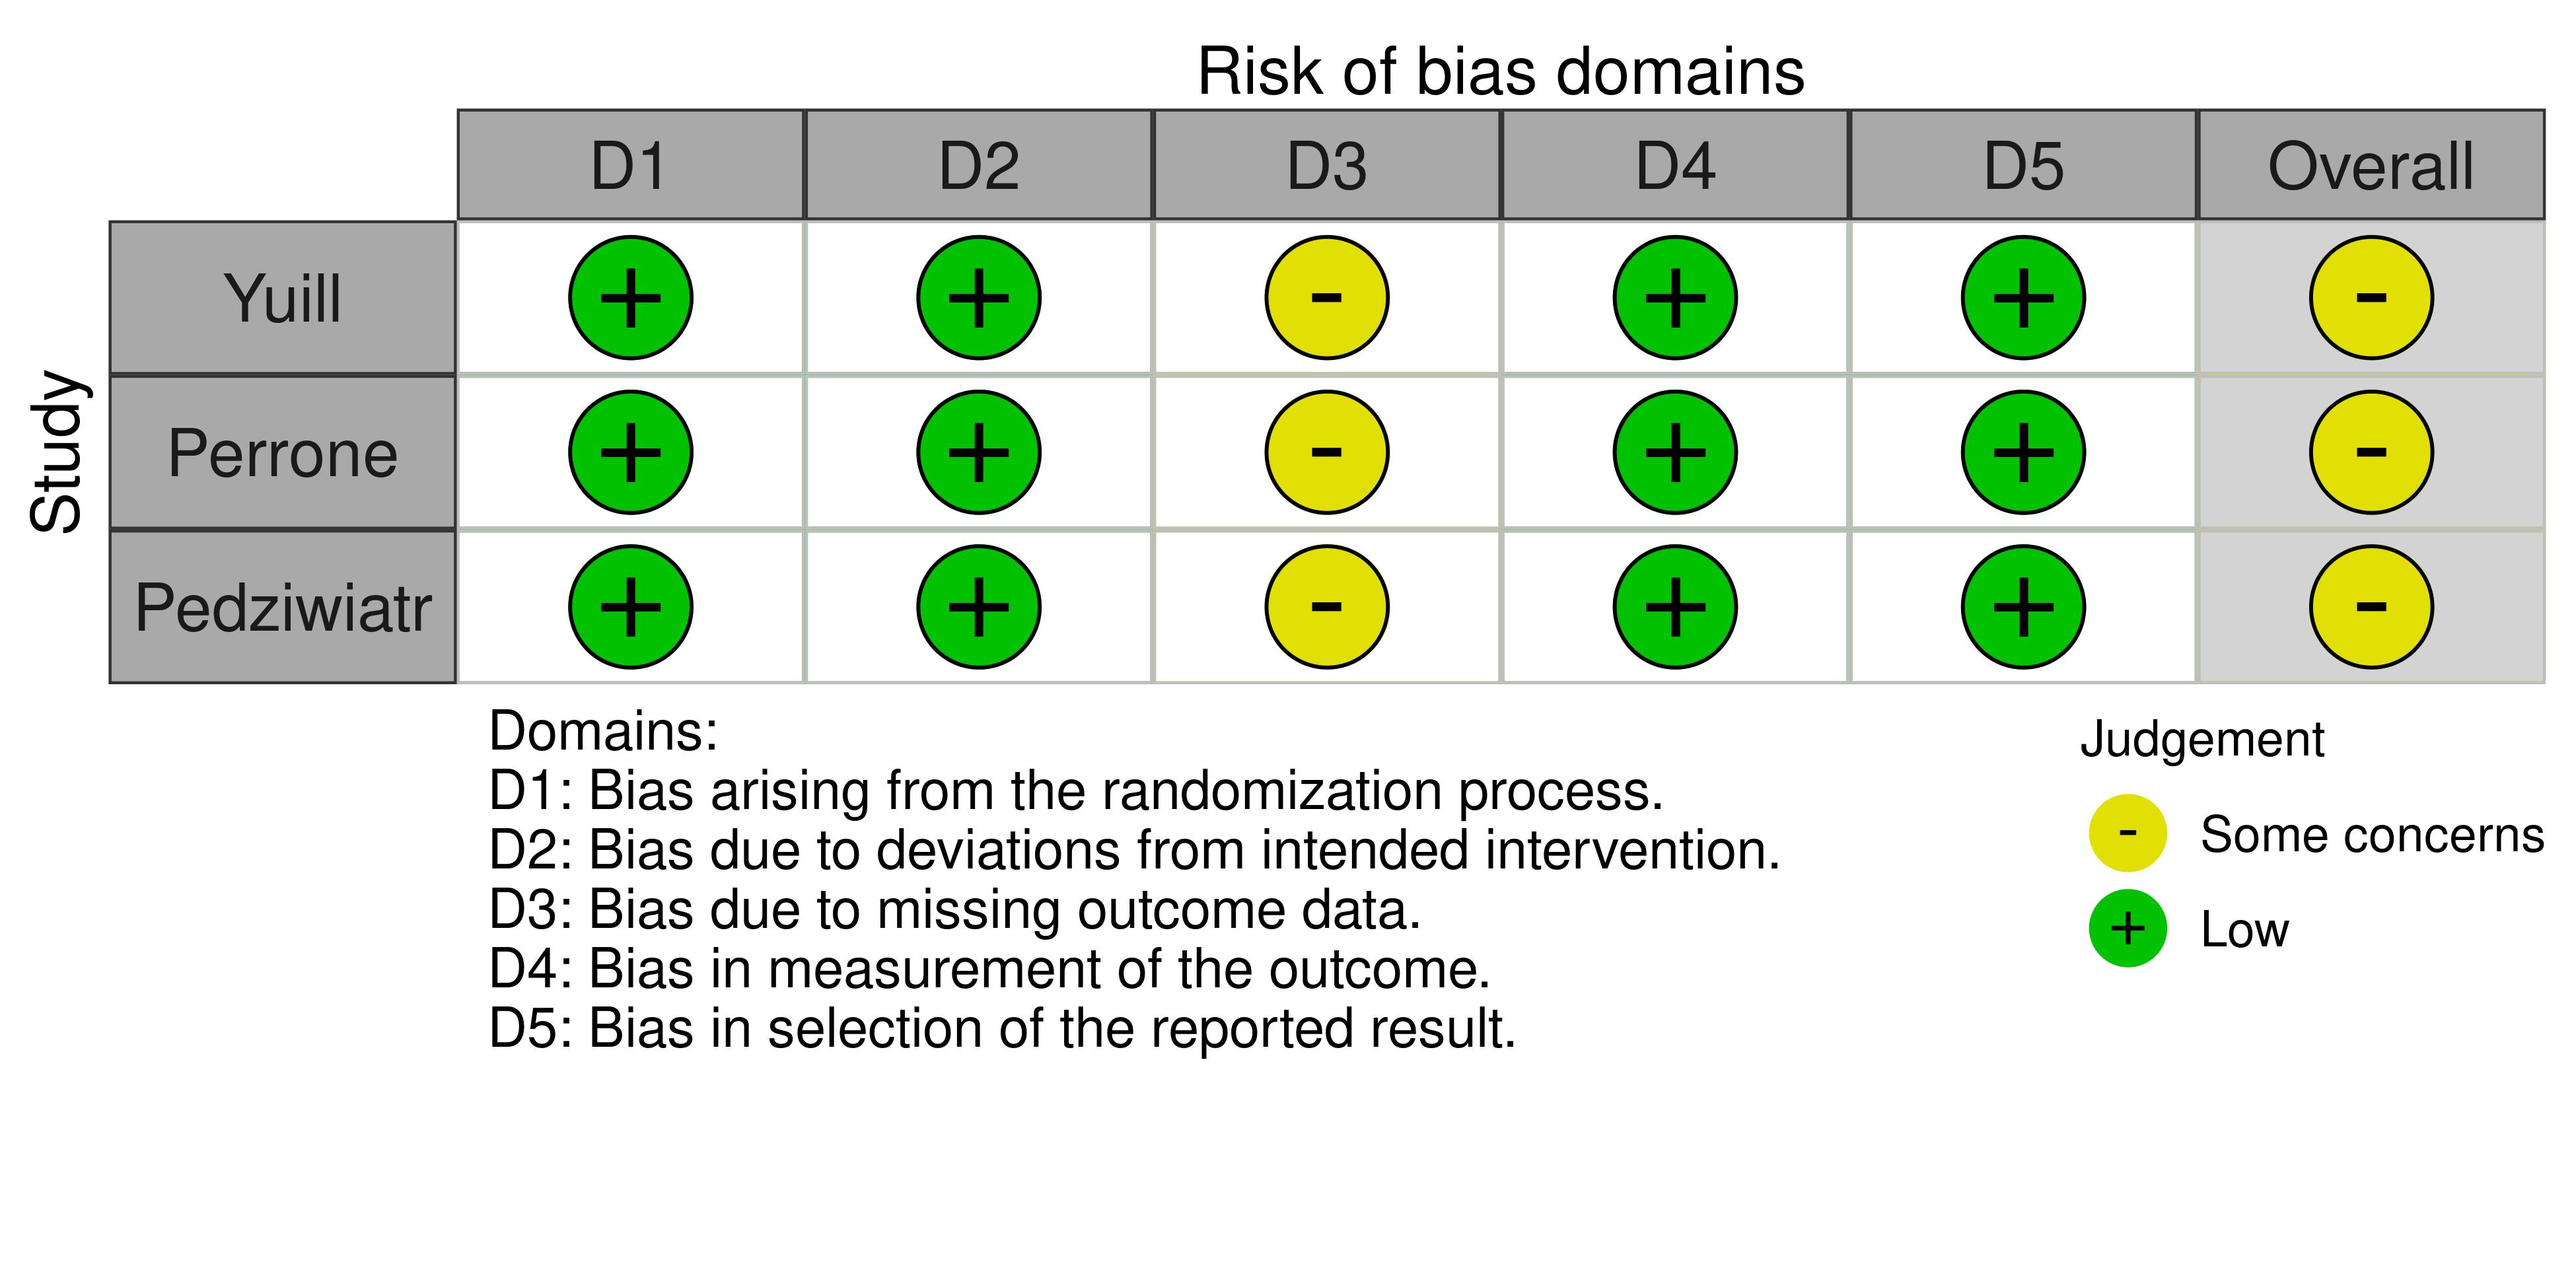


*S16. Postoperative insulin levels in postoperative day 1*


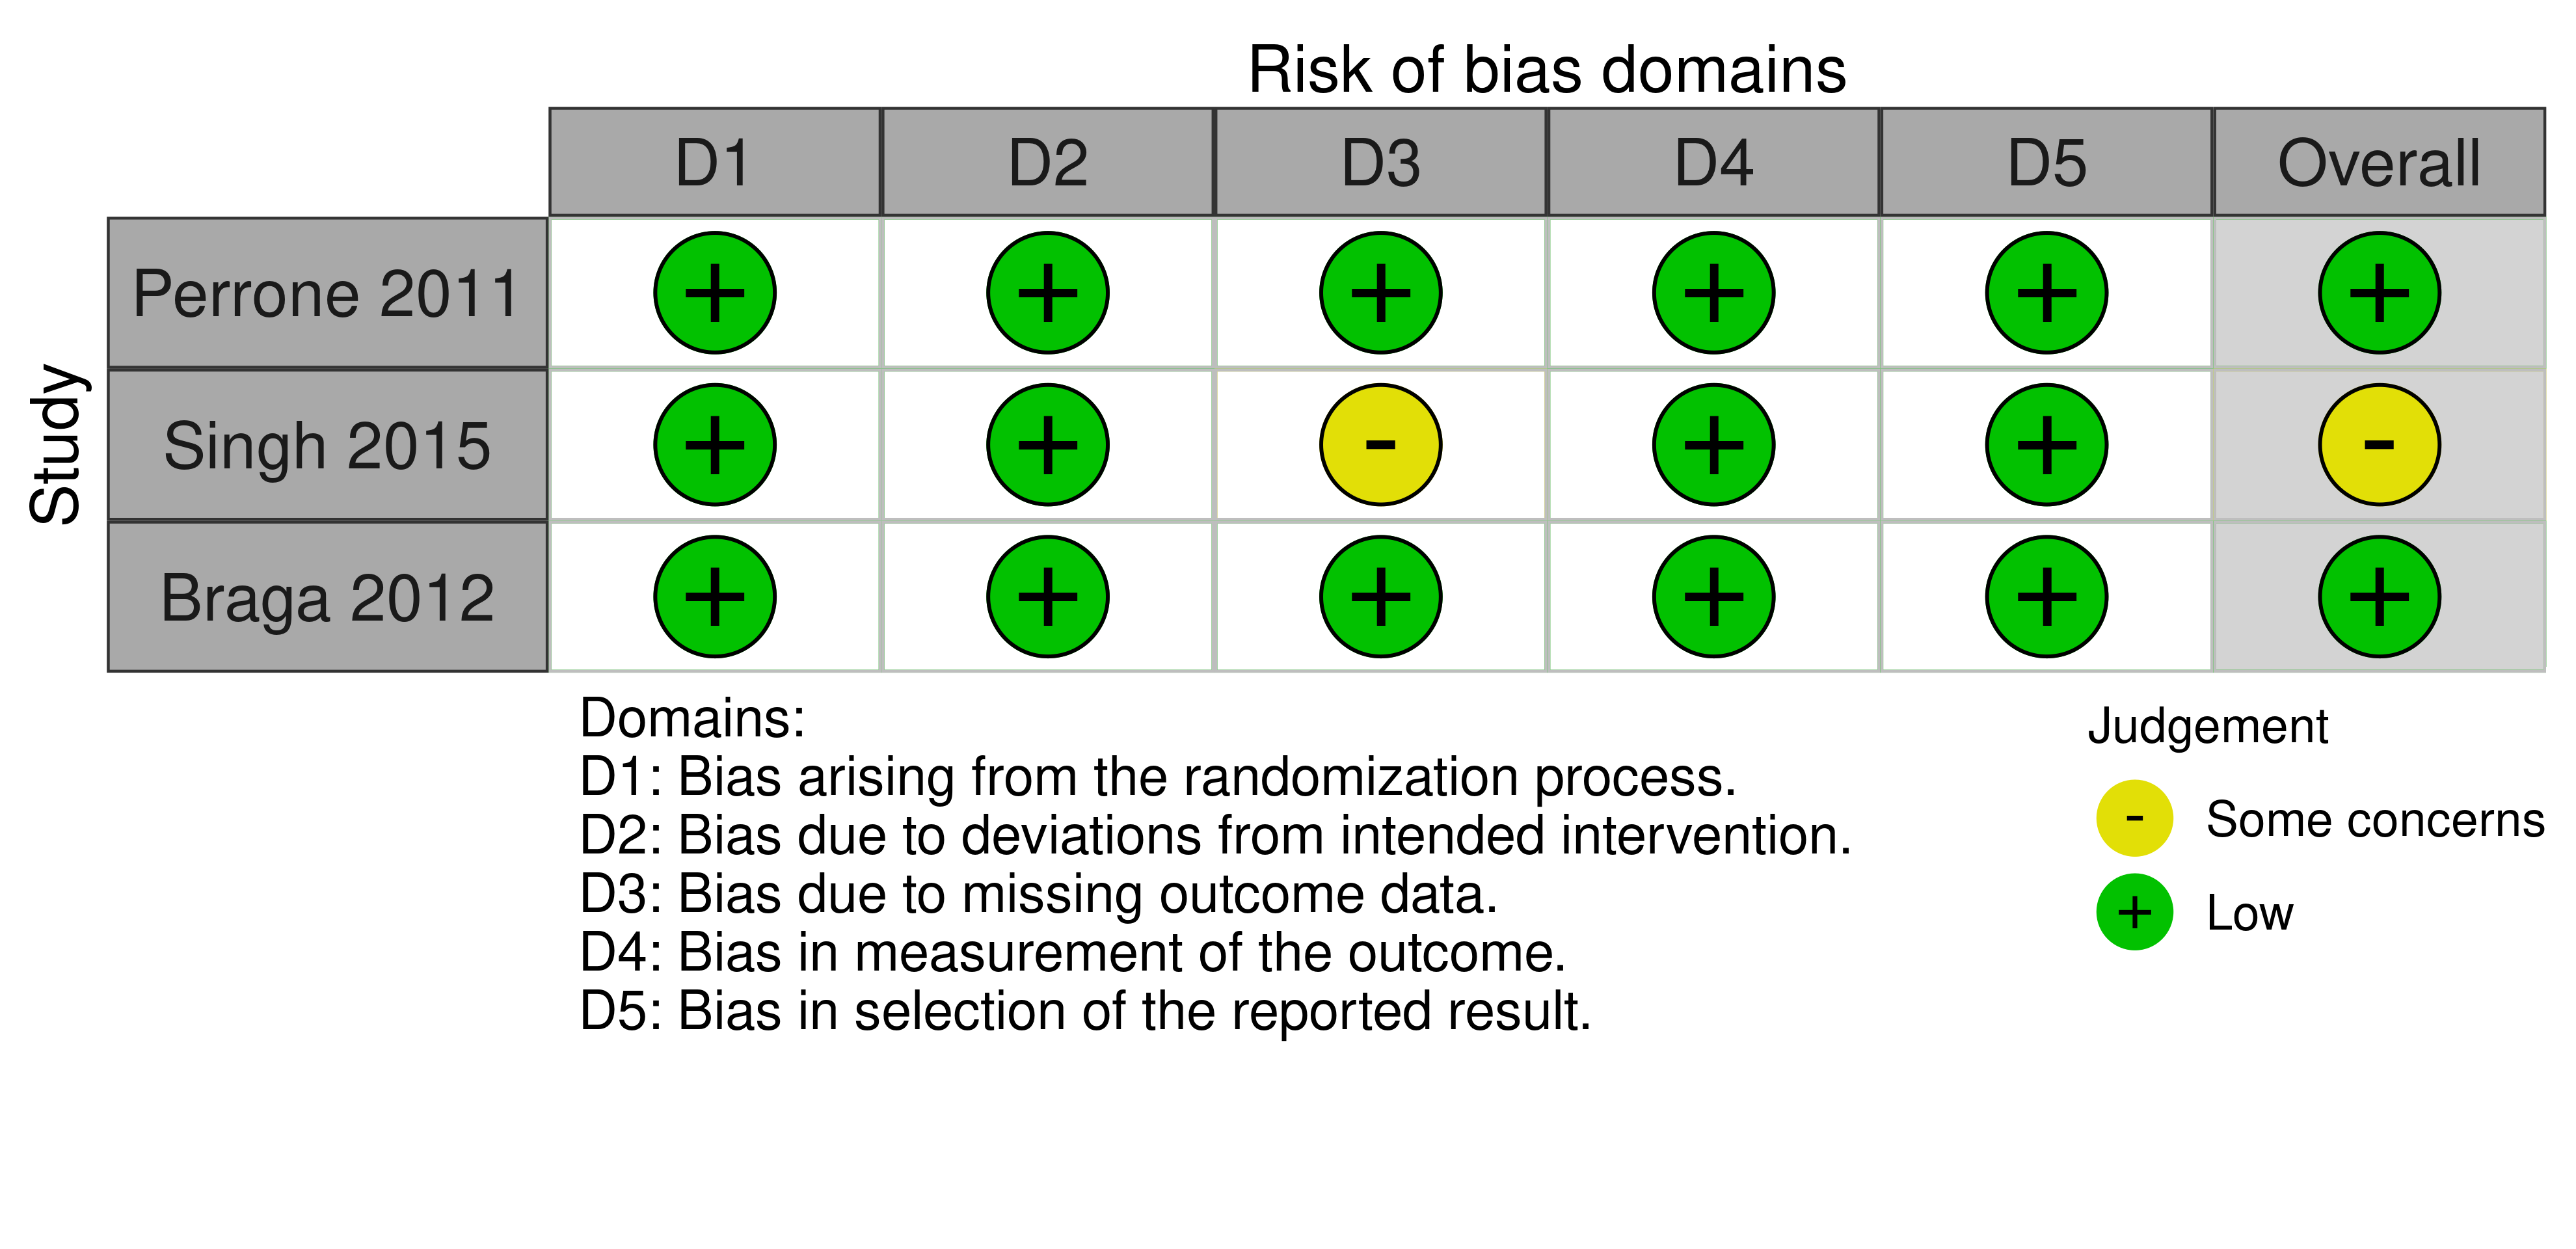


*S17. Postoperative CRP levels on postoperative day 1*

## **GRADE assesement**


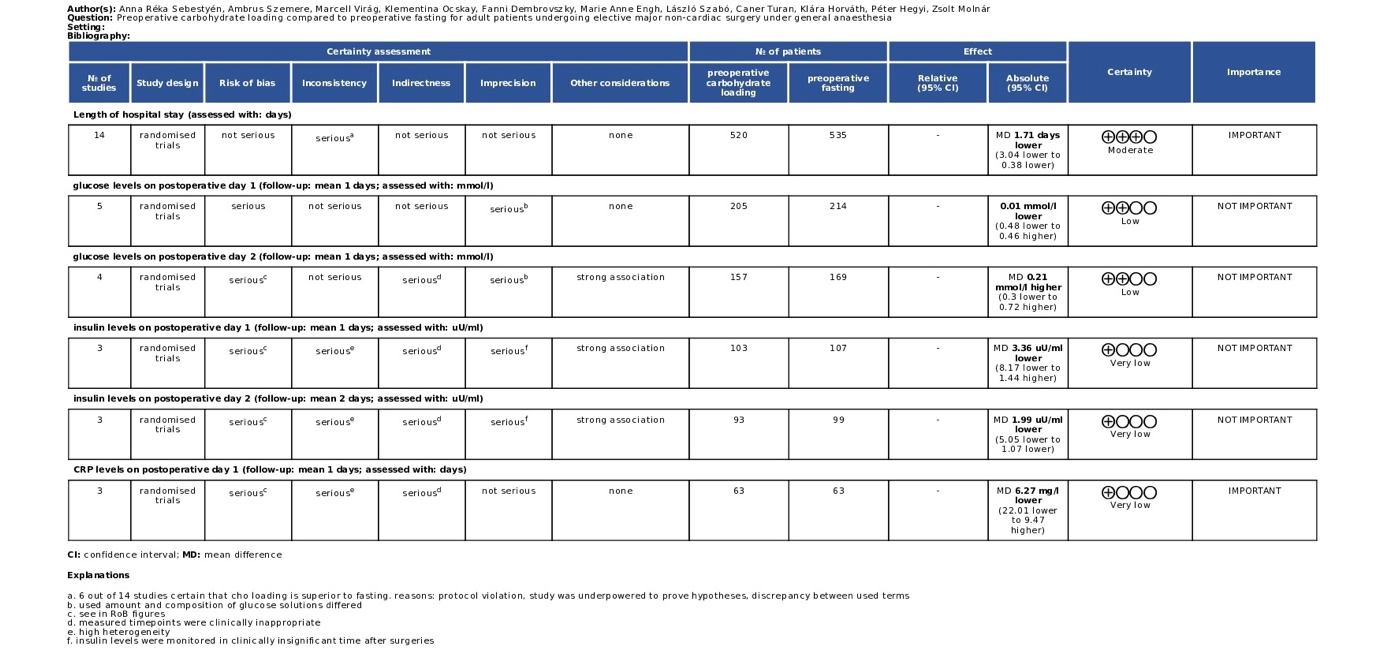


*S18. GRADE assesement of preoperative carbohydrate loading versus fasting*


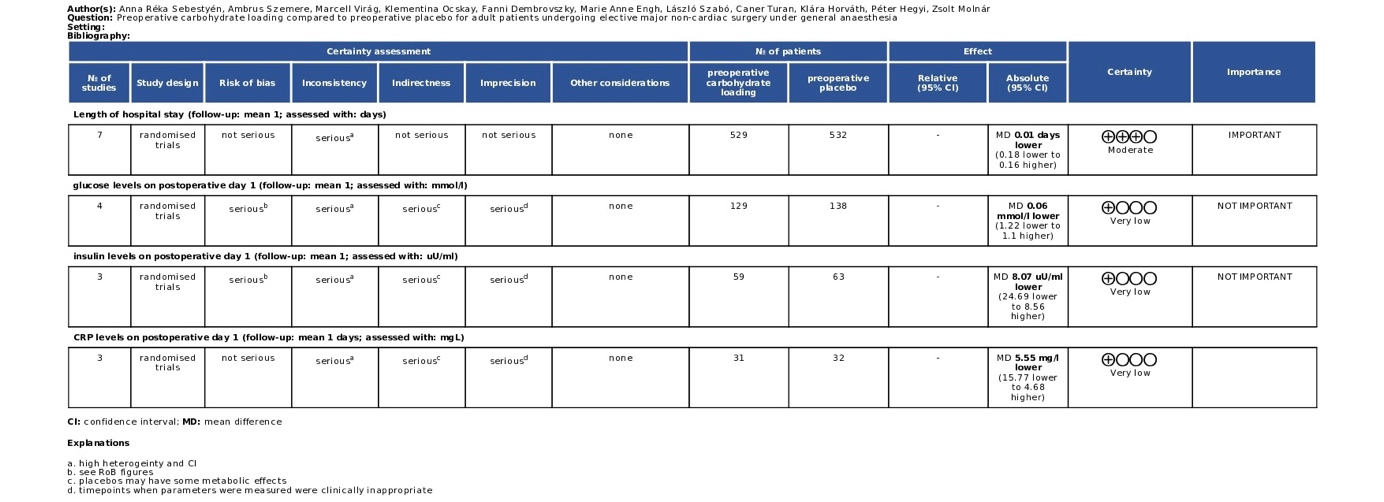


*S19. GRADE assesement of preoperative carbohydrate loading versus fasting*
